# Supplementary material
Source: PubMed Central journal article supplement (PMC3993181)
Supplement: AEM.00090-14_zam999105270so1.pdf [file AEM.00090-14_zam999105270so1.pdf]

## Supplemental Material

Table S1. Growth of WT and  $\Delta$ BC\_2216-17 mutant in various stressful conditions

| Stress tested                | Stress condition                     | Growth condition | Time to reach stationary phase for both strains | Conclusion for the 2 strains |
|------------------------------|--------------------------------------|------------------|-------------------------------------------------|------------------------------|
| high temperature             | 42°C                                 | microplate       | OD>1 in 3.5h                                    | similar growth               |
|                              | 45°C                                 | microplate       | OD>1 in 4.5h                                    | similar growth               |
| acid (HCl supplementation)   | pH 5.5                               | microplate       | OD>1 in 7h                                      | similar growth               |
|                              | pH 5.0                               | microplate       | OD>1 in 12h                                     | similar growth               |
|                              | pH 4.7                               | microplate       | OD>1 in 32h                                     | similar growth               |
| basic (NaOH supplementation) | pH 8.5                               | microplate       | OD>1 in 12h                                     | similar growth               |
|                              | pH 8.6                               | microplate       | OD>1 in 13h                                     | similar growth               |
| Oxydative agent              | 100µM paraquat                       | microplate       | OD>1.5 in 16h                                   | similar growth               |
|                              | 150µM paraquat                       | microplate       | OD>1.3 in 14h                                   | similar growth               |
|                              | AAPH 100mM                           | microplate       | OD>1.2 in 12h                                   | similar growth               |
|                              | AAPH 150mM                           | microplate       | OD>1.0 in 12h                                   | similar growth               |
|                              | 0.020% H <sub>2</sub> O <sub>2</sub> | microplate       | OD>1 in 12h                                     | similar growth               |
|                              | 0.025% H <sub>2</sub> O <sub>2</sub> | microplate       | OD>1 in 12h                                     | similar growth               |
| high osmolarity              | 4 % NaCl                             | microplate       | OD>1 in 18h                                     | similar growth               |
|                              | 6 % NaCl                             | microplate       | OD>0.8 in 36h                                   | similar growth               |
| low osmolarity               | 0 % NaCl                             | flask            | OD>1 in 4h                                      | similar growth               |
| Ethanol                      | 4%                                   | flask            | OD>1 in 3h                                      | similar growth               |
|                              | 6%                                   | flask            | OD>0.1 in 9h                                    | similar growth               |
| Ions chelators               | EDTA 0.1mM                           | flask            | OD>1 in 7h                                      | similar growth               |
|                              | EGTA 0.1mM                           | flask            | OD>0.5 in 8h                                    | similar growth               |
|                              | 2,2'-bipyridyl 100µM                 | flask            | OD>0.2 in 5h                                    | similar growth               |
|                              | 2,2'-bipyridyl 500µM                 | flask            | OD>0.1 in 5h                                    | similar growth               |

Growth in Erlenmeyer flasks was performed in 50ml LB at 37°C with shaking at 200rpm, after inoculation to an OD<sub>600</sub> of 0.01 by an overnight grown culture. OD<sub>600</sub> was measured in microcuvettes. Growth in microplates was performed in 250 µl LB at 37°C with shaking, after inoculation by 10µl of an overnight grown culture in an automatic turbidimeter (see material & methods section). OD<sub>600</sub> was measured every 15 min.

Temperature was set at 37°C, pH at 7.0, and NaCl concentration at 1%, unless stated differently.

Fig. S2 Survival of *B. cereus* WT and  $\Delta casKR$  strains at 37°C

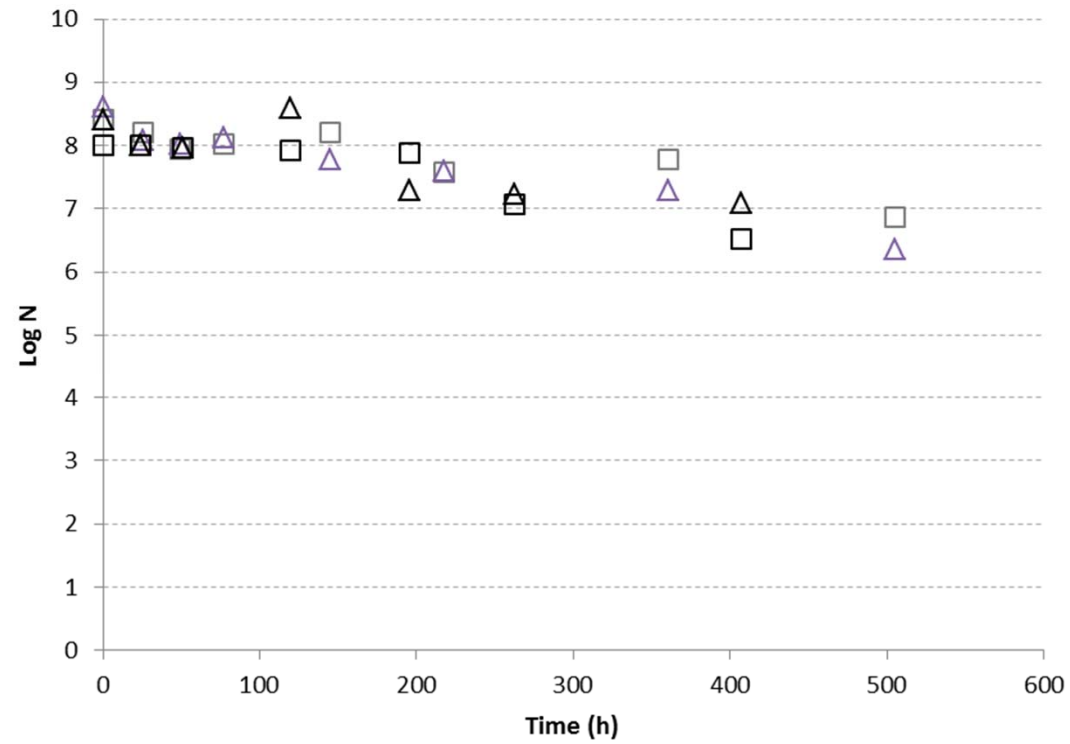

*Bc* WT (squares) and  $\Delta casKR$  (triangles) bacterial suspension were incubated in LB at 37°C. Cfu numeration was performed regularly over time. Black and grey represent data from replicates 1 and 2, respectively.

Fig. S3. The  $\Delta BC\_5411-12$  mutant can grow at low temperature

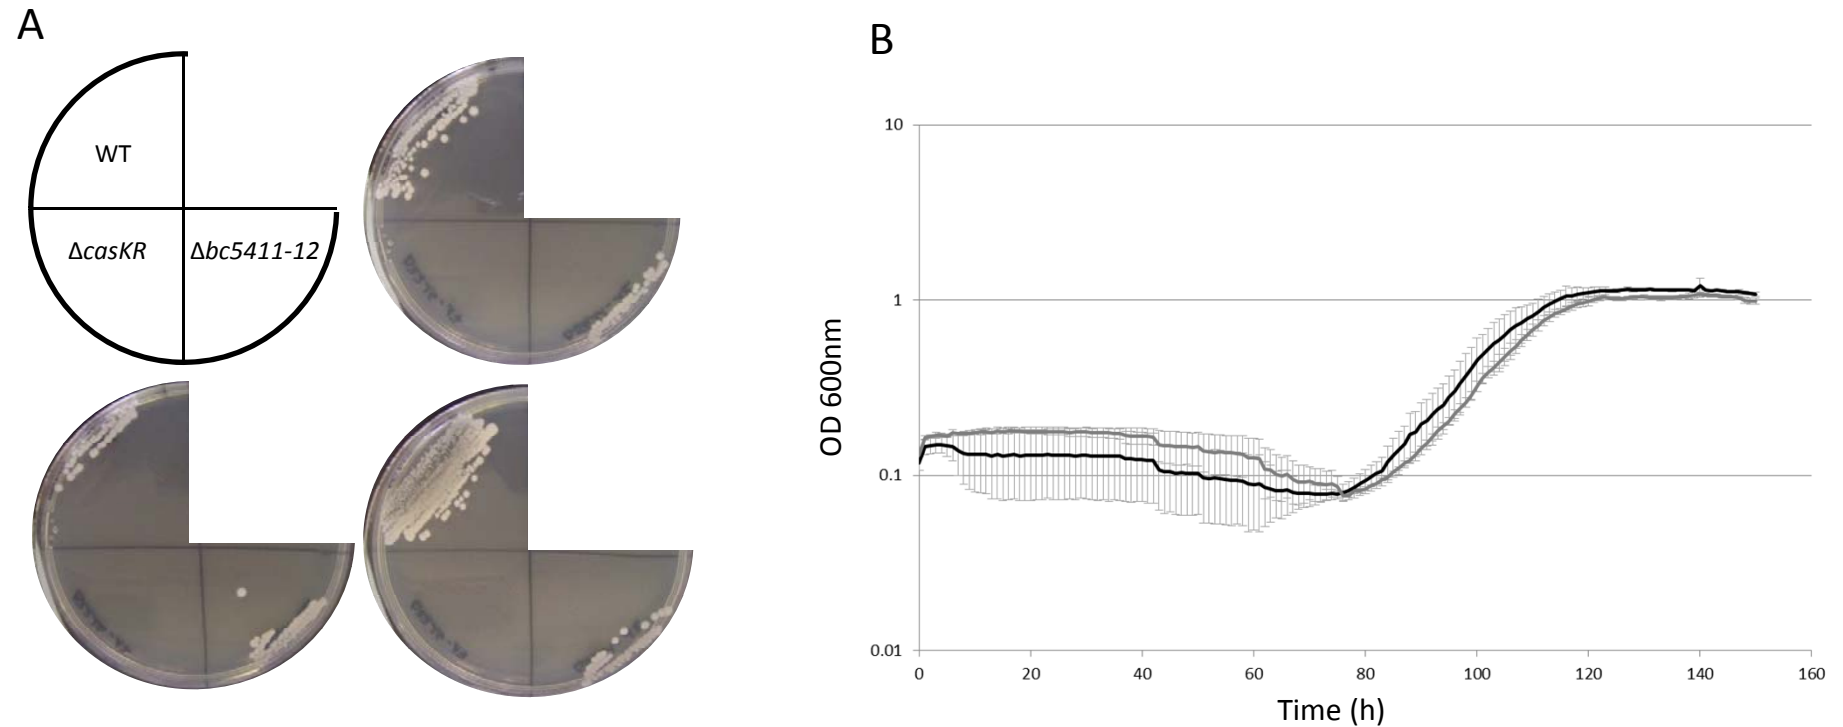

A. The  $\Delta BC\_5411-12$  mutant can grow at  $T_{min}$ . One colony of overnight grown culture of *B. cereus* WT,  $\Delta BC\_5411-12$  and  $\Delta casKR$  was struck on LB agar and incubated at  $10^{\circ}\text{C}$  for 14 days. Three independent replicates are shown.

B. The  $\Delta BC\_5411-12$  mutant can grow at  $12^{\circ}\text{C}$ , similarly as the WT strain. Growth of WT (black) and  $\Delta BC\_5411-12$  (grey) strains was performed in an automated turbidimeter with shaking at  $12^{\circ}\text{C}$ . Mean values  $\pm$  SD of three biological replicates are shown.

**Fig. S4. Graphic display of *casKR* Orthologs and Neighborhood genes in the *B. cereus* Group (*sensu lato*).**

Orthologs of *casKR* genes (*bc2216-17*) and their neighborhoods in all available genomes are shown below, using Conserved Neighborhood Viewer of Integrated Microbial Genomes (Markowitz *et al.*, 2012). Genes of the same color (except light yellow) are from the same cluster of orthologous gene (COG). Light yellow: no COG assignment; Red/Blue: *casKR* orthologs.

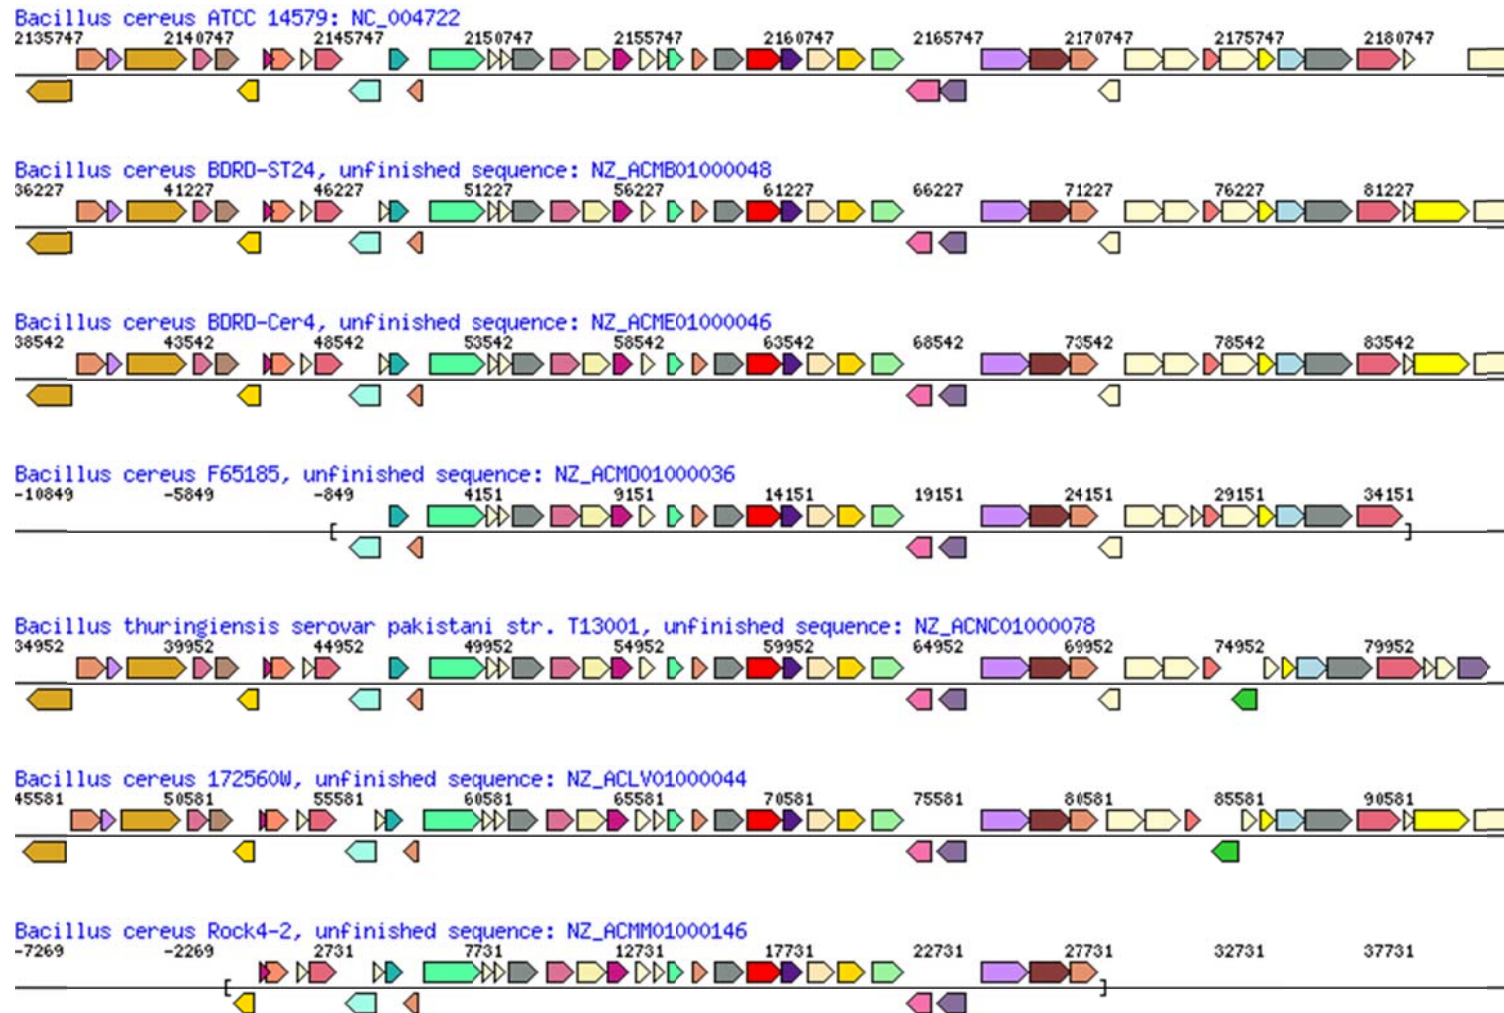

*Bacillus thuringiensis* BMB171 chromosome: NC\_014171

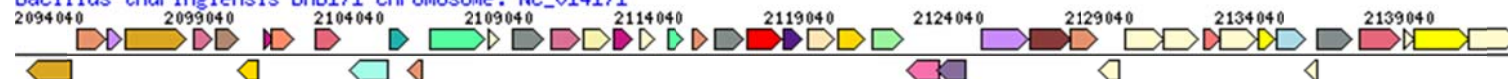

*Bacillus cereus* m1550, unfinished sequence: NZ\_ACMA01000043

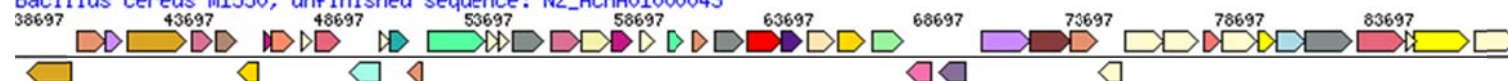

*Bacillus thuringiensis* serovar kurstaki str. T03a001, unfinished sequence: NZ\_ACND01000061

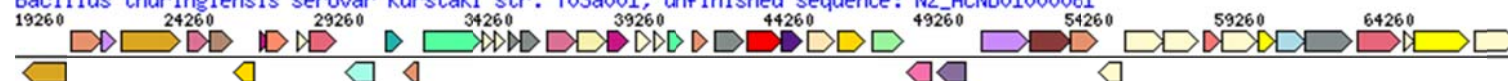

*Bacillus cereus* RCH\_BC2 (Abyss contigs Sep '10) : bcer1769\_4272G\_16094\_60

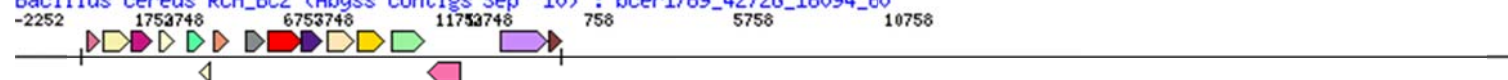

*Bacillus cereus* VD196 : AHFL01000006

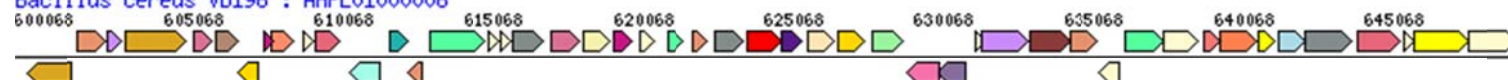

*Bacillus cereus* VD154 : AHFG01000004

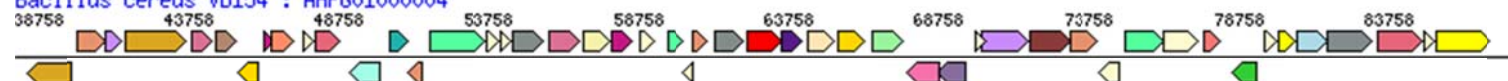

*Bacillus cereus* VD166 : AHFI01000016

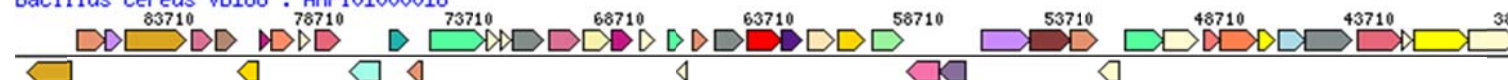

*Bacillus cereus* B4264: NC\_011725

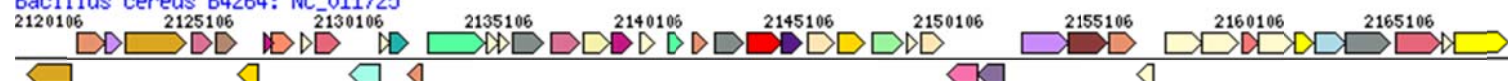

*Bacillus cereus* AH676, unfinished sequence: NZ\_ACMQ01000078

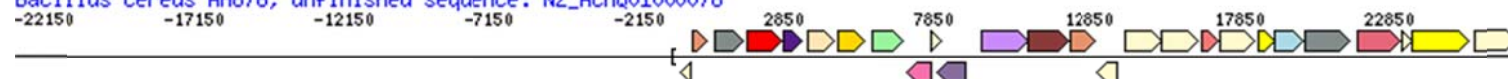



Bacillus sp. 7\_6\_55CFAA\_CT2 : NZ\_ACWE01000035

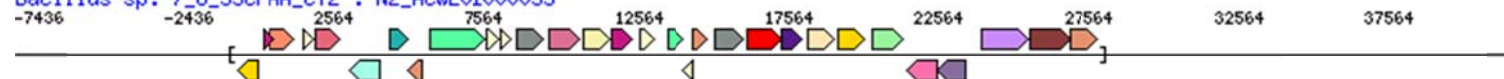

Bacillus cereus BAG4X12-1 : AHDG01000022

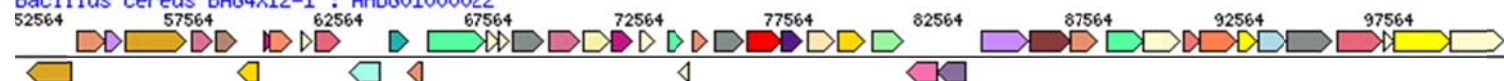

Bacillus cereus BAG5X12-1 : AHDK01000019

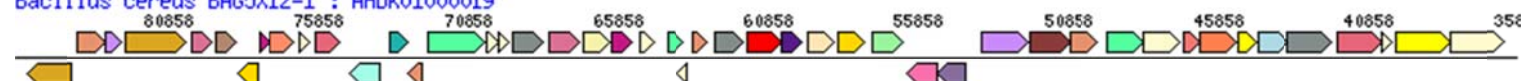

Bacillus cereus ATCC 10876, unfinished sequence: NZ\_ACLT01000051

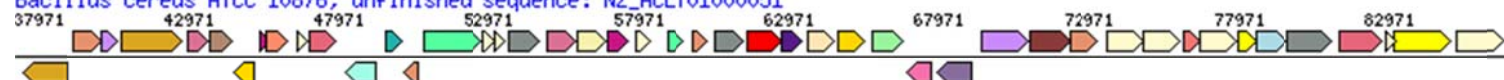

Bacillus cereus VD045 : AHET01000016

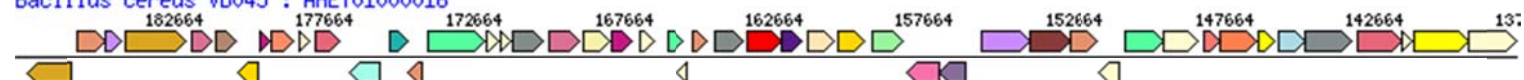

Bacillus cereus VD133 : AHFB01000032

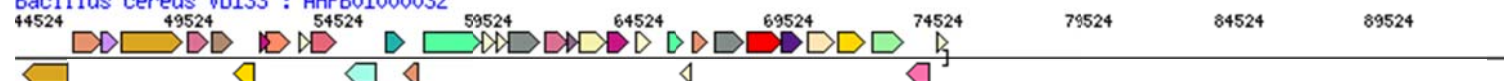

Bacillus cereus RCH\_BC1 (Abyss contigs Sep '10) : bcer1767\_2270L\_16145\_157

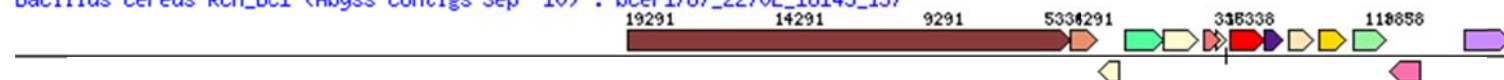

Bacillus thuringiensis serovar berliner ATCC 10792, unfinished sequence: NZ\_ACNF01000056

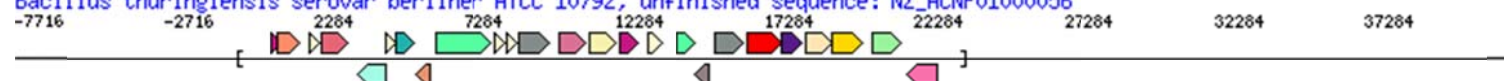

Bacillus cereus BAG3X2-2 : AHDE01000025

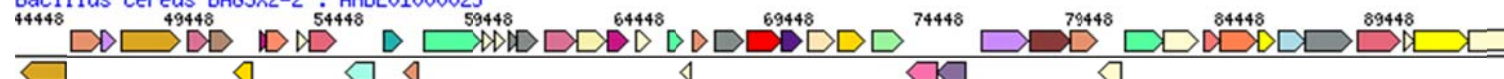

*Bacillus cereus* BAG40-1 : AHDF01000026

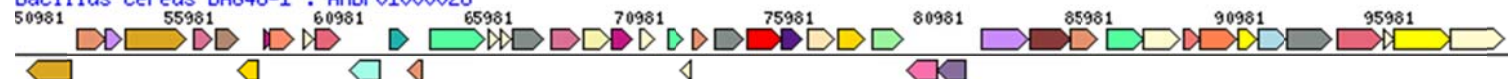

*Bacillus cereus* BAG30-2 : AHDC01000029

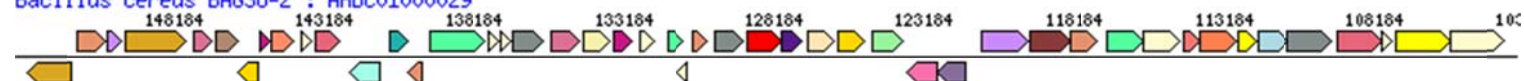

*Bacillus cereus* ISP2954 : AHEJ01000042

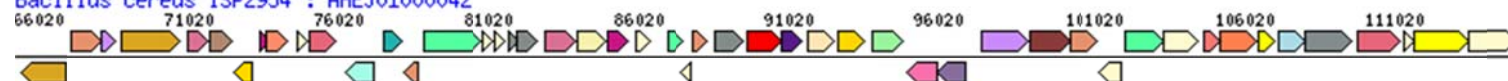

*Bacillus cereus* VD169 : AHFJ01000020

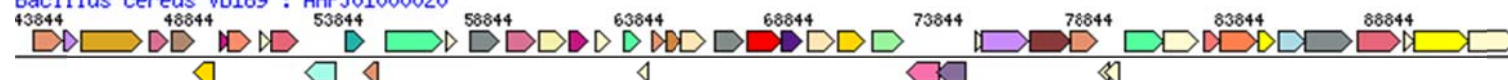

*Bacillus cereus* HD73 : AHDU01000043

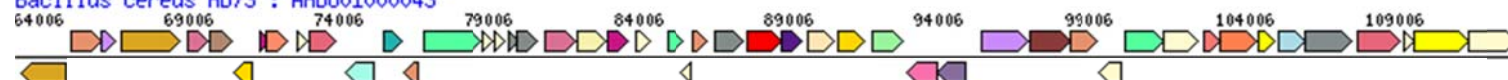

*Bacillus cereus* BMG1.7 : AHDQ01000057

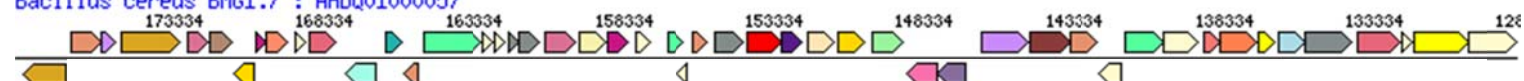

*Bacillus thuringiensis* sv. *kurstaki* HD73 : CP004069

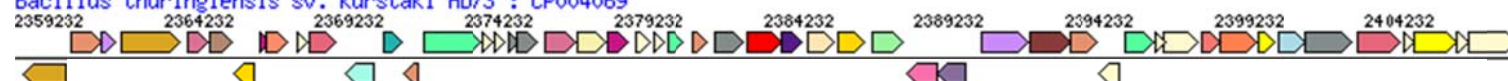

*Bacillus cereus* HuB13-1 : AHEC01000057

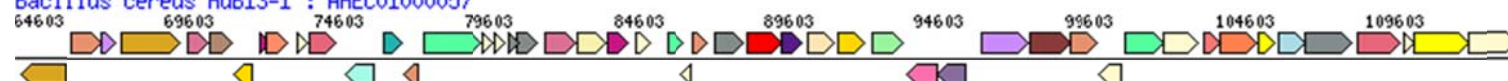

*Bacillus cereus* Rock1-15, unfinished sequence: NZ\_ACMH01000053

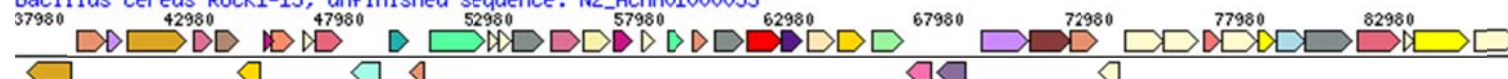

*Bacillus cereus* VD184 : AHFK01000037

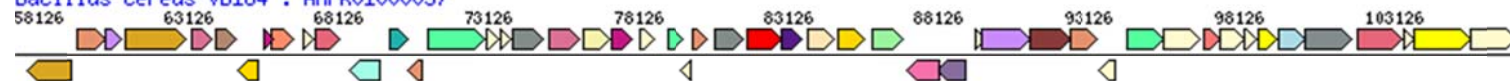

*Bacillus cereus* VD200 : AHFM01000030

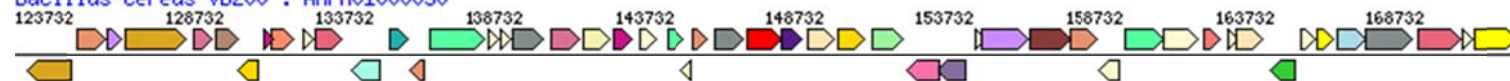

*Bacillus cereus* MSX-A1 : AHE001000031

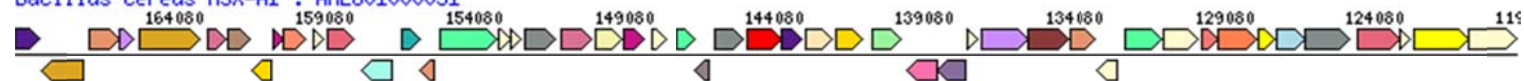

*Bacillus cereus* HuB1-1 : AHEB01000024

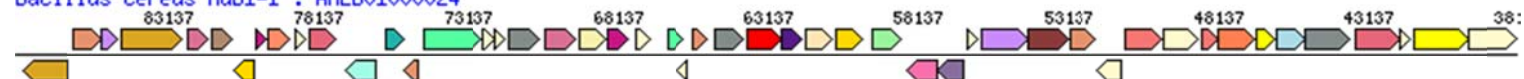

*Bacillus cereus* VD140 : AHFD01000030

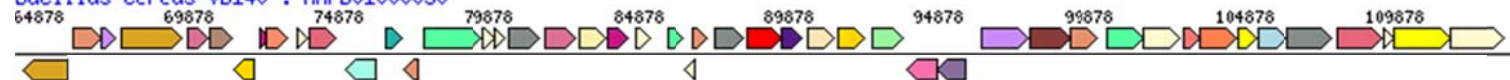

*Bacillus cereus* BAG1X1-2 : AHCR01000018

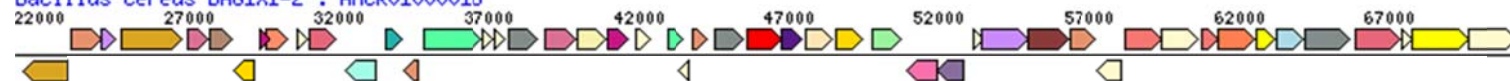

*Bacillus cereus* BAG10-3 : AHCP01000020

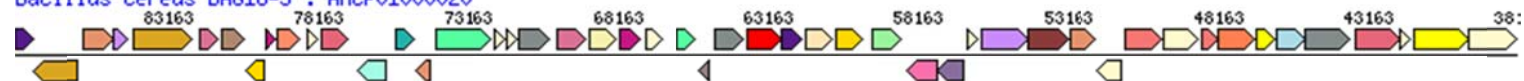

*Bacillus thuringiensis* serovar israelensis ATCC 35646, unfinished sequence: NZ\_AAJM01000131

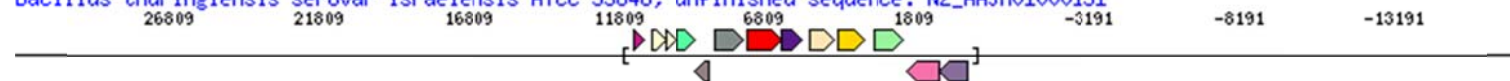

*Bacillus thuringiensis* IBL 4222, unfinished sequence: NZ\_ACNL01000070

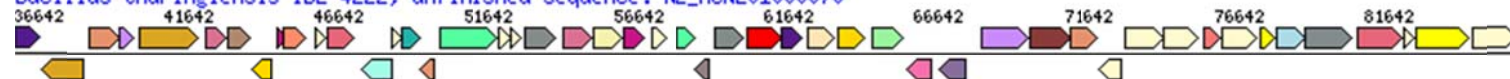



*Bacillus thuringiensis* Bt407 : CP003889

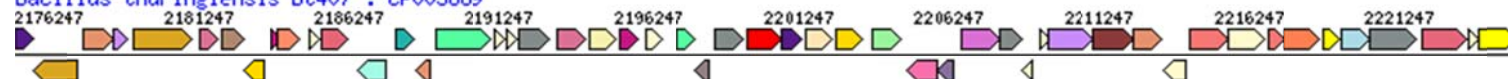

*Bacillus thuringiensis* sv. *thuringiensis* IS5056 : CP004123

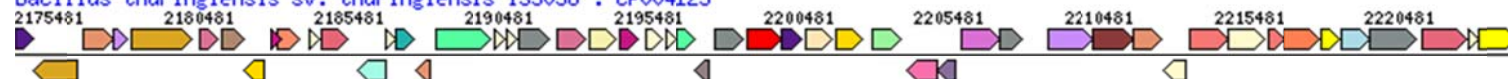

*Bacillus thuringiensis* T01-328 : ARXZ02000003

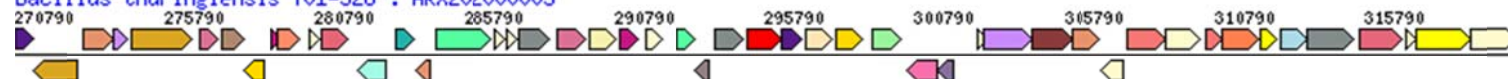

*Bacillus thuringiensis* Bt407, unfinished sequence: NZ\_ACMZ01000048

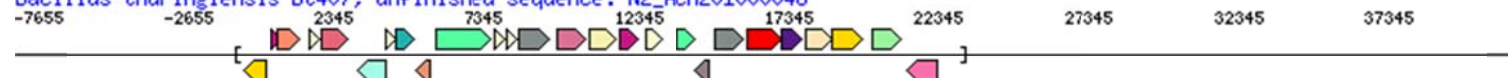

*Bacillus thuringiensis* serovar *thuringiensis* str. T01001, unfinished sequence: NZ\_ACNA01000049

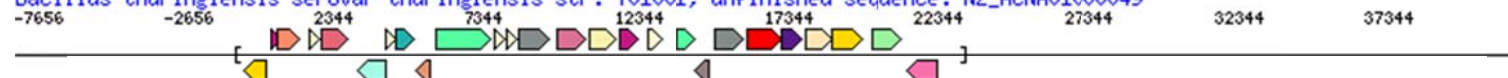

*Bacillus thuringiensis* serovar *chinensis* CT-43: CP001907

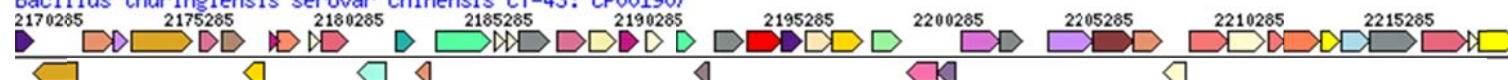

*Bacillus thuringiensis* HD-789 : CP003763

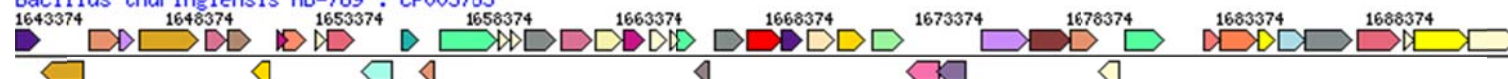

*Bacillus cereus* VD022 : AHCK01000017

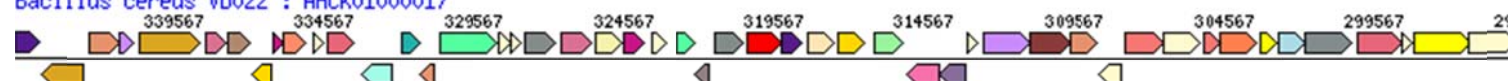

*Bacillus thuringiensis* HD-771 : CP003752

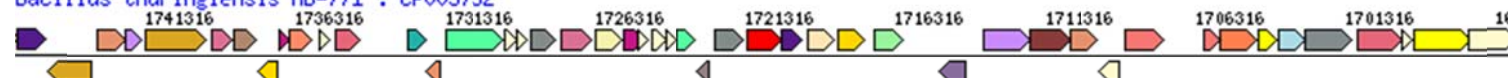

Bacillus cereus Schrouff : AHCI01000014

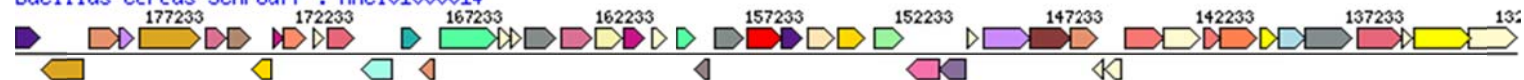

Bacillus cereus TIAC219 : AHCJ01000031

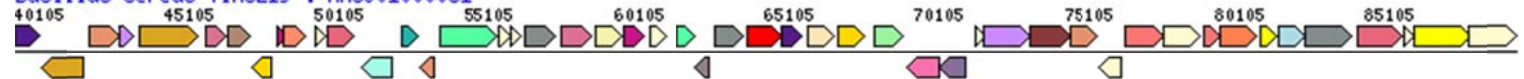

Bacillus cereus K-5975c : AHEL01000026

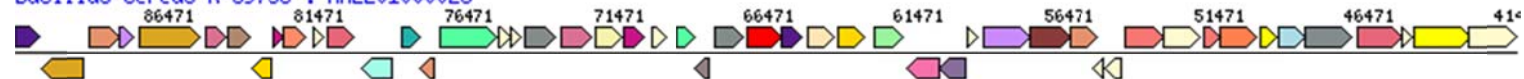

Bacillus cereus G9842: NC\_011772

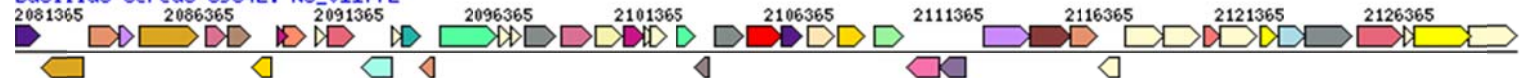

Bacillus thuringiensis serovar sotto str. T04001, unfinished sequence: NZ\_ACNB01000076

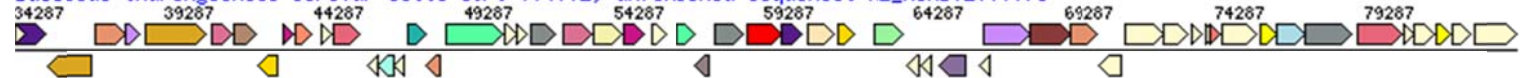

Bacillus thuringiensis serovar huazhongensis BGSC 4BD1, unfinished sequence: NZ\_ACNI01000045

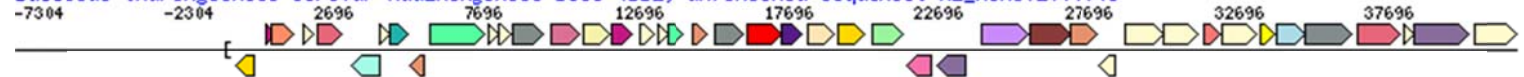

Bacillus thuringiensis IBL 200, unfinished sequence: NZ\_ACNK01000048

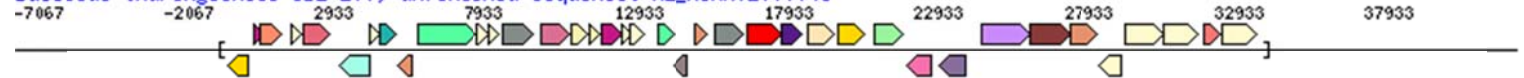

Bacillus cereus HuB4-4 : AHEF01000048

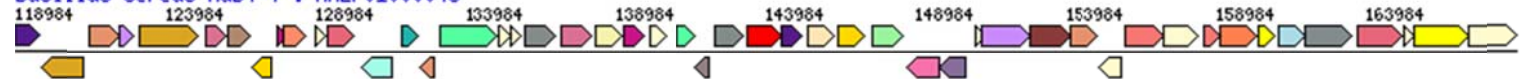

Bacillus cereus BAG1X2-1 : AHCT01000027

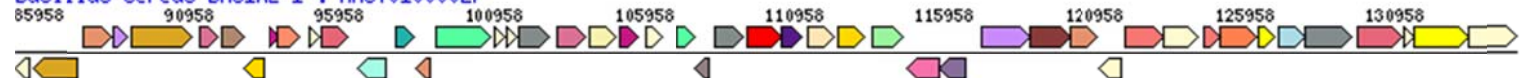

Bacillus cereus BAG1X2-3 : AHCV01000043

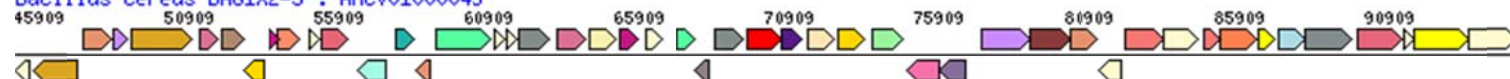

Bacillus cereus BAG1X2-2 : AHCU01000022

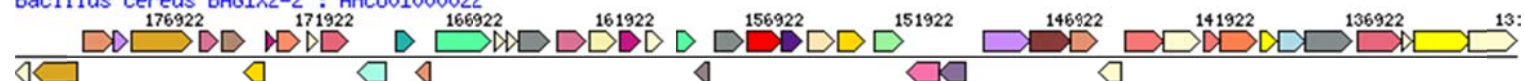

Bacillus cereus BAG20-1 : AHCW01000024

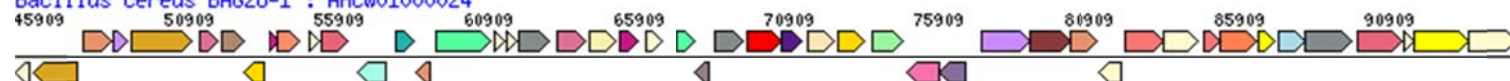

Bacillus cereus BAG1X1-1 : AHCQ01000035

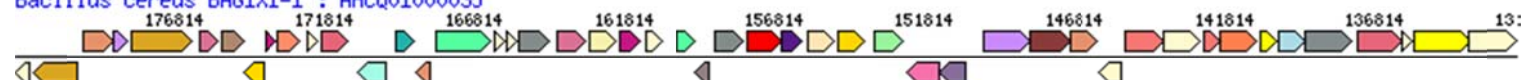

Bacillus cereus VD014 : AHER01000028

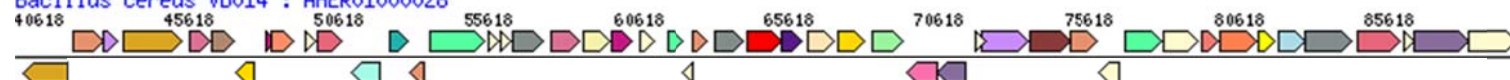

Bacillus cereus VD156 : AHFH01000027

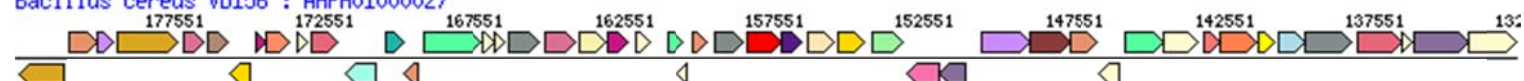

Bacillus thuringiensis MC28 : CP003687

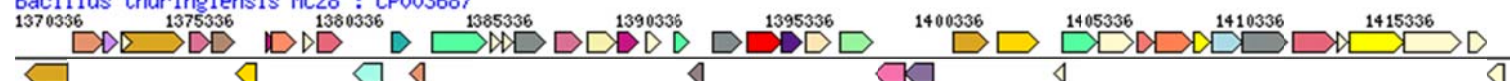

Bacillus cereus Rock3-29, unfinished sequence: NZ\_ACMJ01000039

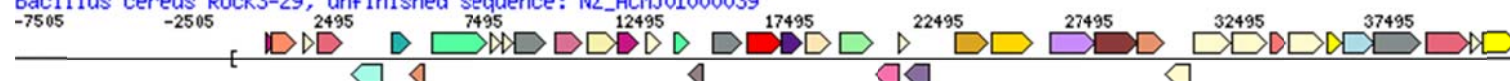

Bacillus cereus BAG50-1 : AHDI01000010

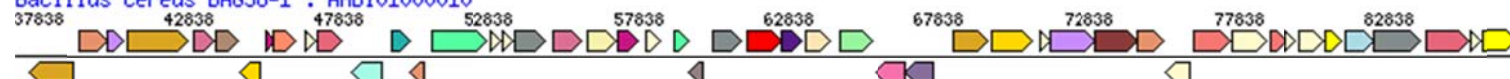



Bacillus cereus BAG4X2-1 : AHDH01000032

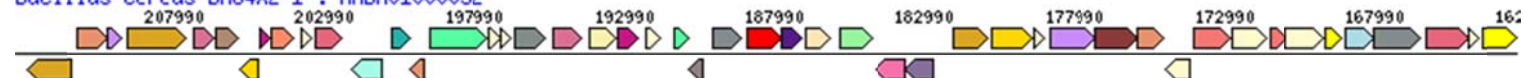

Bacillus cereus HuB2-9 : AHED01000029

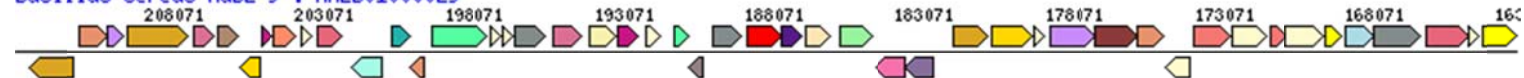

Bacillus cereus BAG10-2 : AHCD01000024

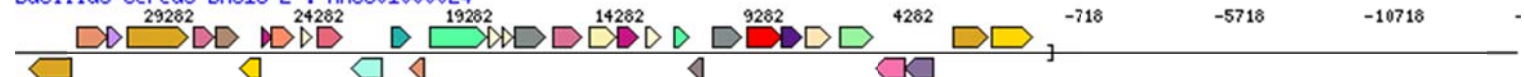

Bacillus cereus VD214 : AHFN01000040

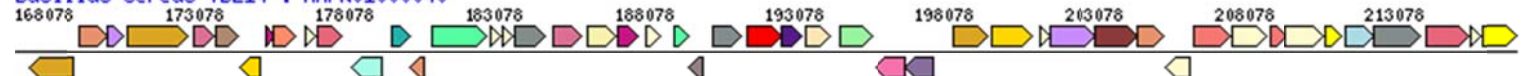

Bacillus cereus HuB4-10 : AHEE01000007

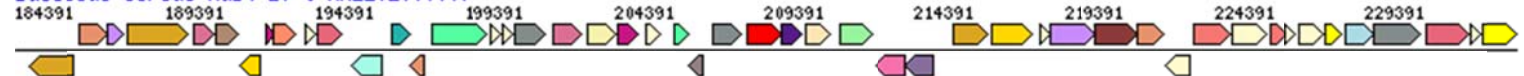

Bacillus cereus HuA2-3 : AHDW01000034

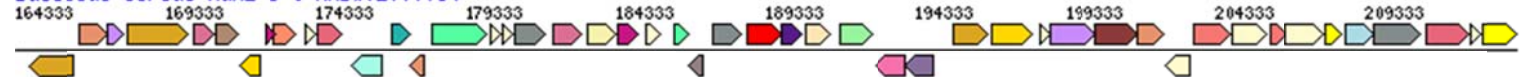

Bacillus cereus VD148 : AHFF01000025

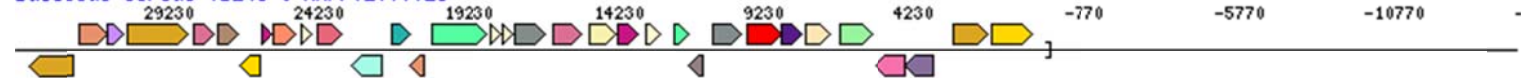

Bacillus cereus VD131 : AHFA01000025

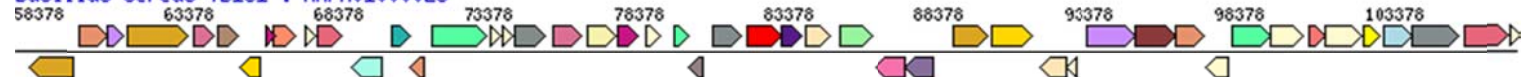

Bacillus cereus BAG60-1 : AHDM01000026

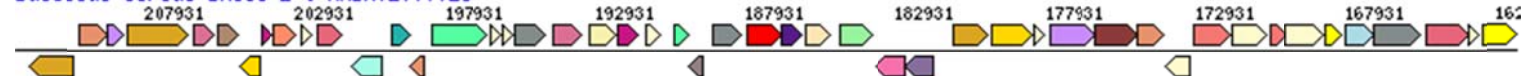



*Bacillus cereus* HuB5-5 : AHEG01000020

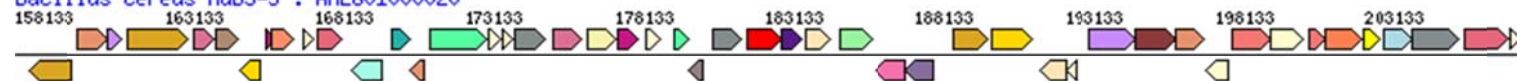

*Bacillus cereus* BAG20-2 : AHCX01000025

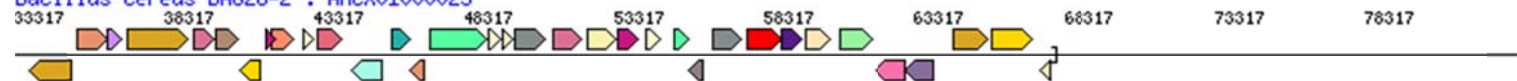

*Bacillus cereus* Rock1-3, unfinished sequence: NZ\_ACMG01000035

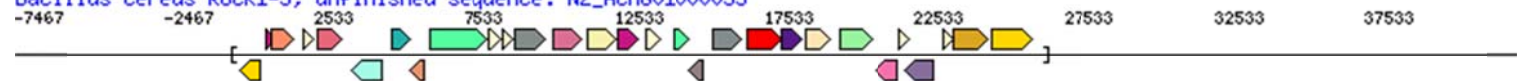

*Bacillus cereus* VD102 : AHEW01000010

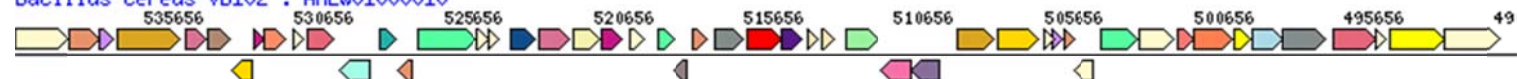

*Bacillus cereus* MSX-D12 : AHEQ01000022

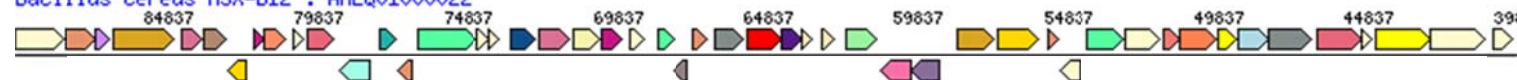

*Bacillus cereus* m1293, unfinished sequence: NZ\_ACLS01000062

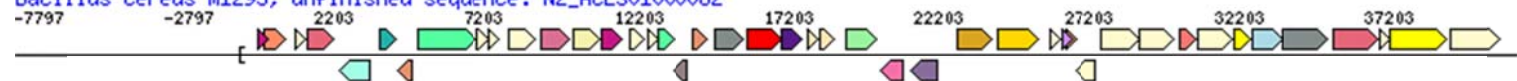

*Bacillus cereus* AND1407 : AHCM01000013

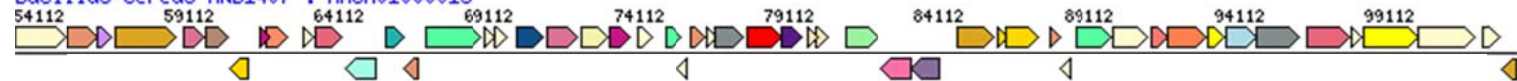

*Bacillus cereus* ATCC 4342, unfinished sequence: NZ\_ACLZ01000032

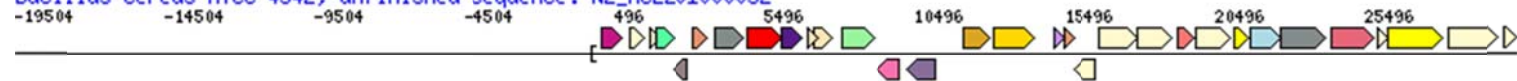

*Bacillus thuringiensis* serovar tochiensis BGSC 4Y1, unfinished sequence: NZ\_ACMY01000057

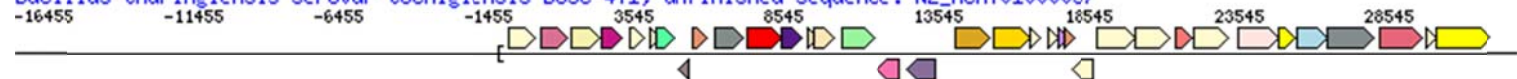

Bacillus cereus MSX-A12 : AHEP01000020

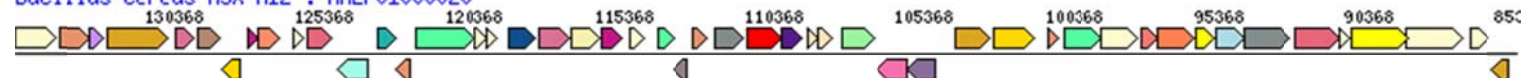

Bacillus cereus IS845/00 : AHEI01000047

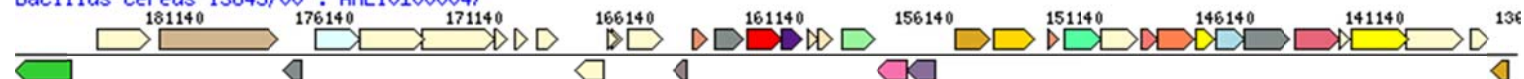

Bacillus cereus IS195 : AHEH01000047

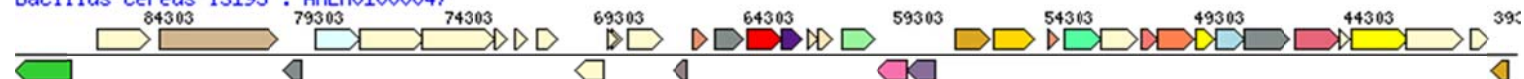

Bacillus cereus IS075 : AHCH02000004

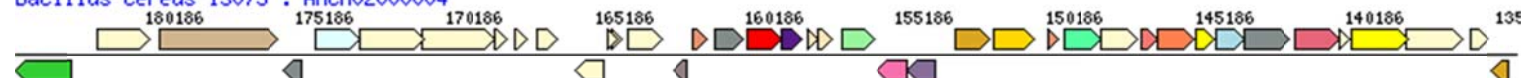

Bacillus thuringiensis serovar konkukian str. 97-27: NC\_005957

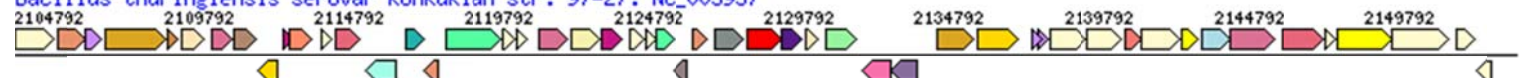

Bacillus cereus BDRD-ST26, unfinished sequence: NZ\_ACMC01000050

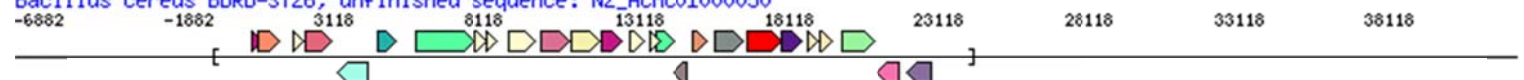

Bacillus cereus 95/8201, unfinished sequence: NZ\_ACMF01000045

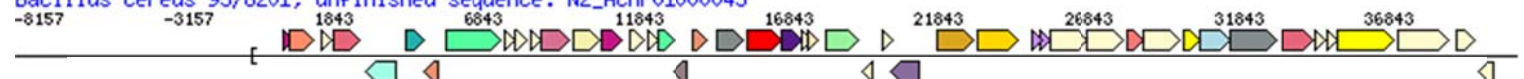

Bacillus thuringiensis serovar monterrey BGSC 4AJ1, unfinished sequence: NZ\_ACNE01000046

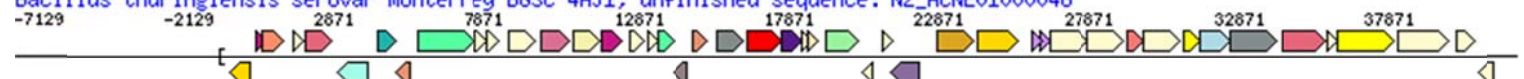

Bacillus cereus ISP3191 : AHEK01000015

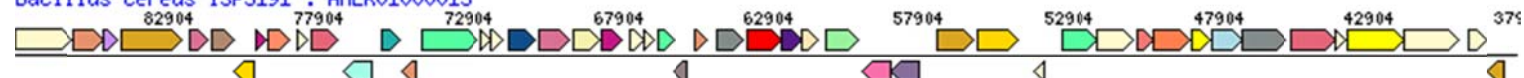

*Bacillus thuringiensis* str. Al Hakam: NC\_008600

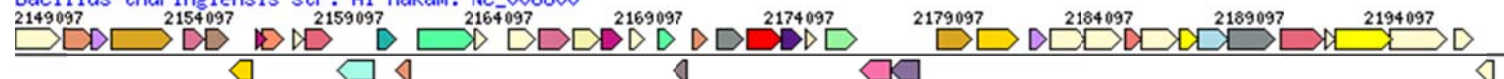

*Bacillus cereus* BGSC 6E1, unfinished sequence: NZ\_ACLU01000051

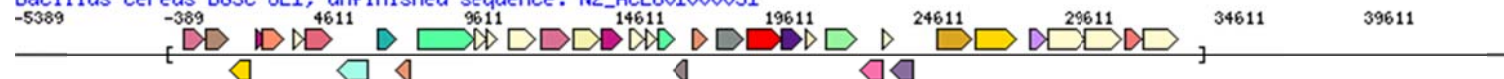

*Bacillus cereus* Rock3-42, unfinished sequence: NZ\_ACMK01000064

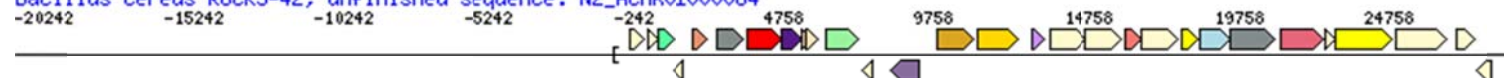

*Bacillus thuringiensis* serovar pulsiensis BGSC 4CC1, unfinished sequence: NZ\_ACNJ01000044

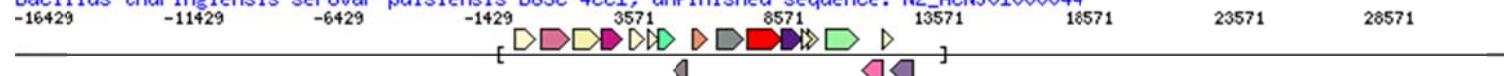

*Bacillus anthracis* H9401 : NC\_017729

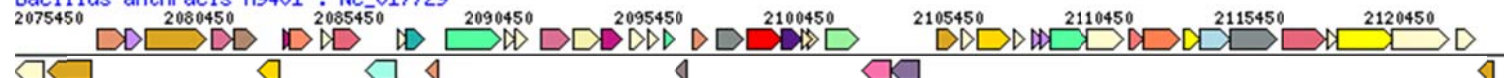

*Bacillus anthracis* str. A2012, unfinished sequence: NZ\_AAAC02000001

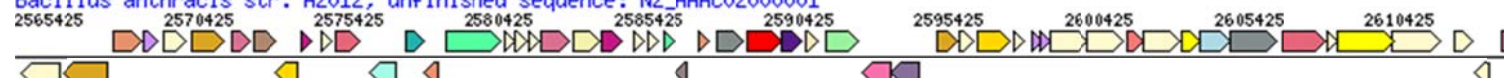

*Bacillus thuringiensis* serovar andalousiensis BGSC 4AW1, unfinished sequence: NZ\_ACNG01000061

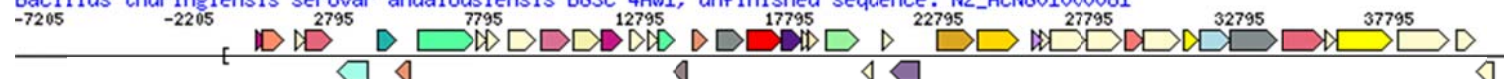

*Bacillus thuringiensis* serovar pondicheriensis BGSC 4BA1, unfinished sequence: NZ\_ACNH01000040

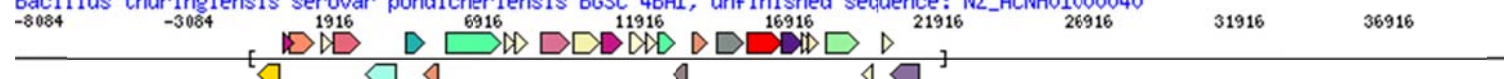

*Bacillus cereus* RCH\_BC3 (Abyss contigs Sep '10) : bcer1768\_2129C\_15225\_56

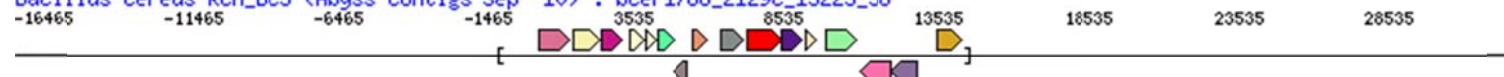



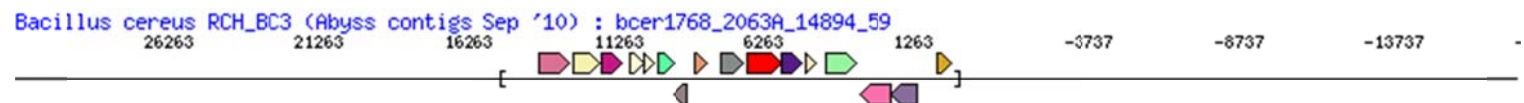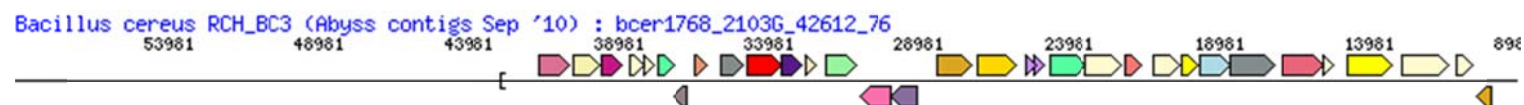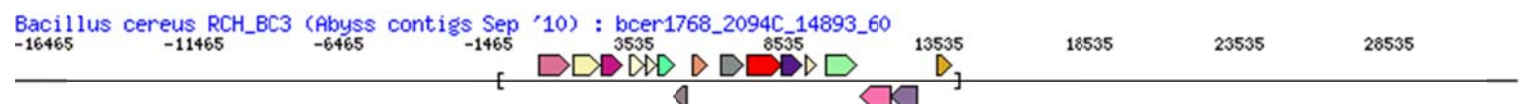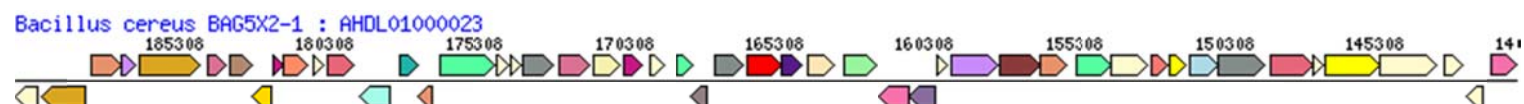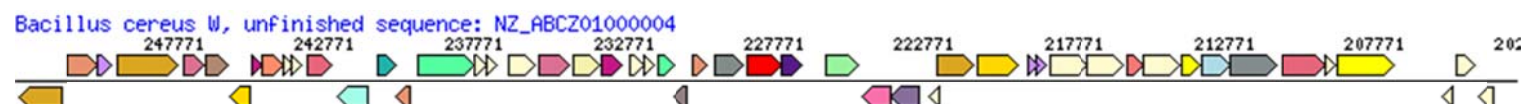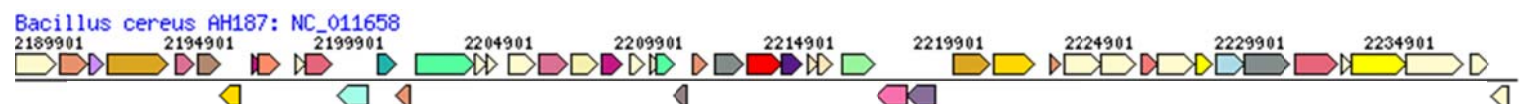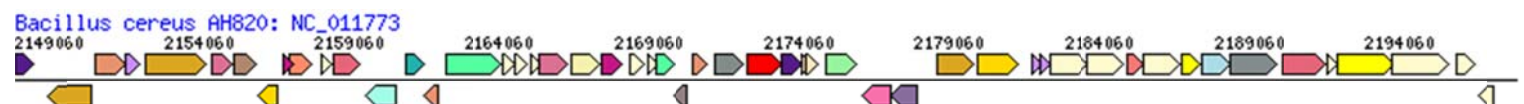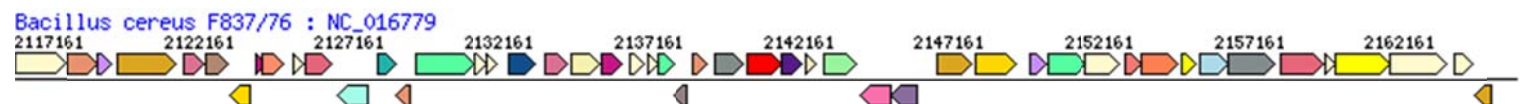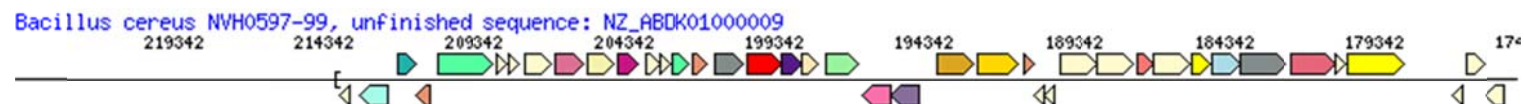



Bacillus cereus 03BB108, unfinished sequence: NZ\_ABDM01000021

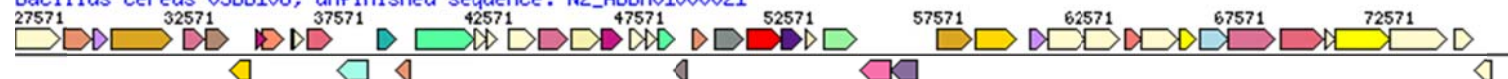

Bacillus cereus 03BB102: NC\_012472

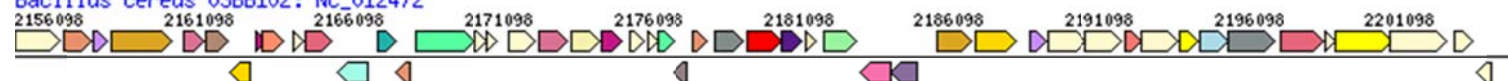

Bacillus anthracis CI chromosome: NC\_014335

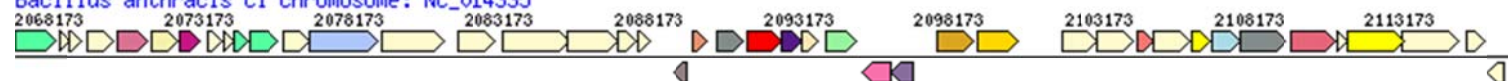

Bacillus cereus MM3, unfinished sequence: NZ\_ACLW01000054

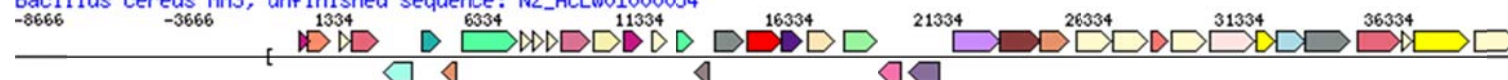

Bacillus anthracis UR-1 : ALNY01000016

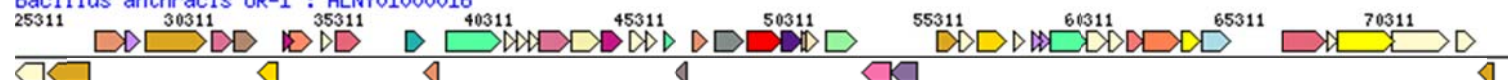

Bacillus anthracis str. Sterne: NC\_005945

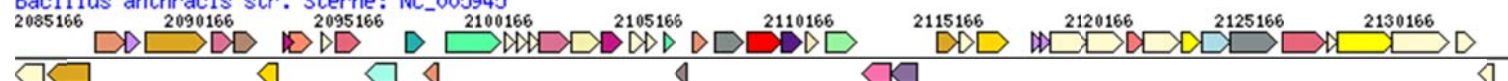

Bacillus anthracis Tsiankovskii-I, unfinished sequence: NZ\_ABDN01000002

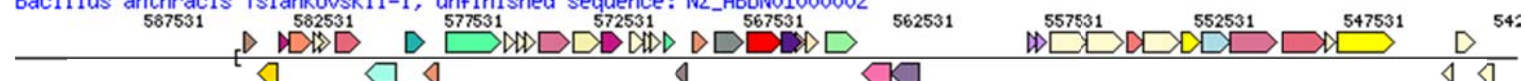

Bacillus anthracis str. A0193, unfinished sequence: NZ\_ABKF01000011

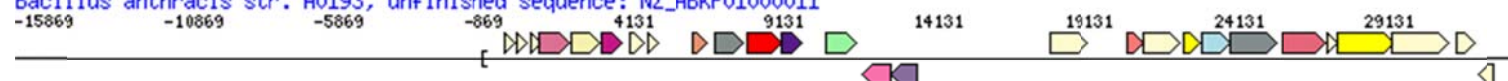

Bacillus anthracis str. A0442, unfinished sequence: NZ\_ABKG01000002

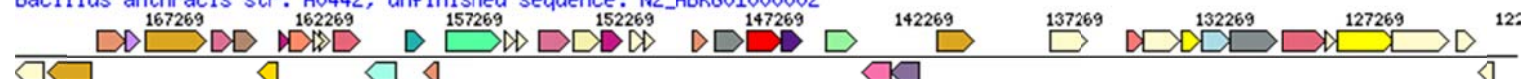

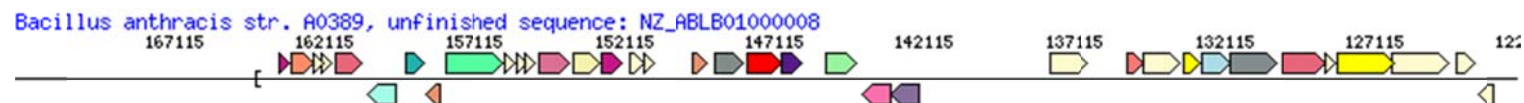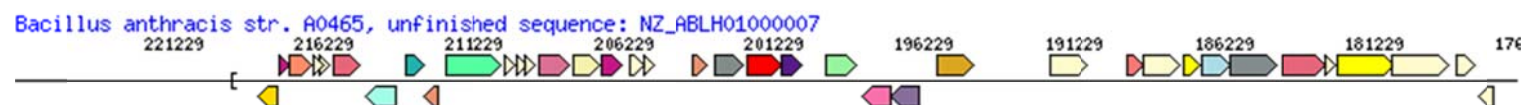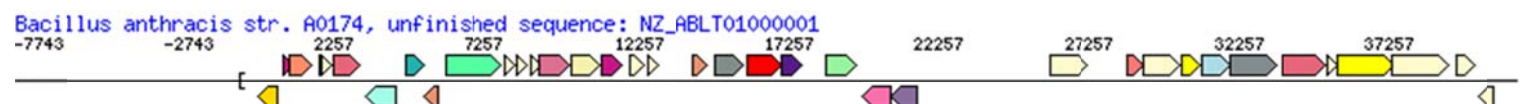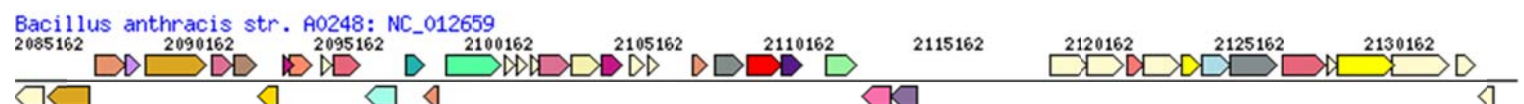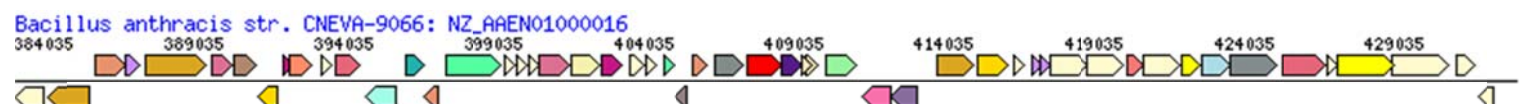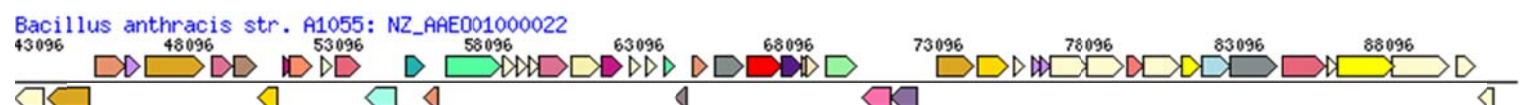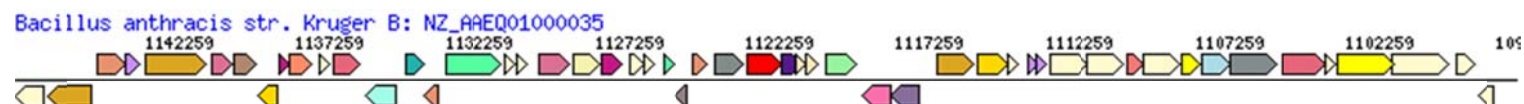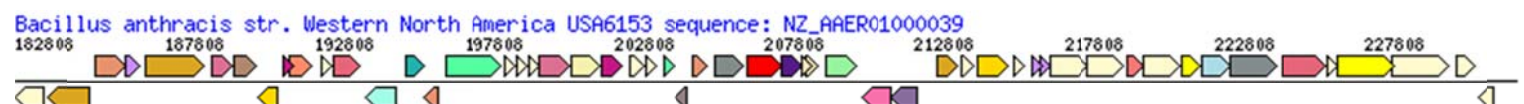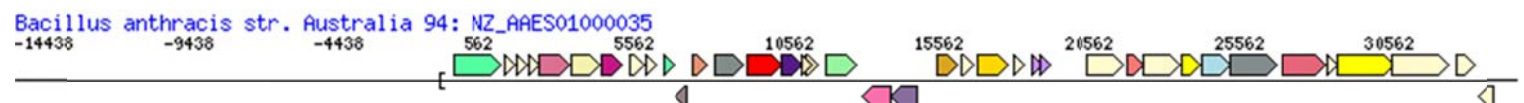

Bacillus cereus VD115 : AHEY01000021

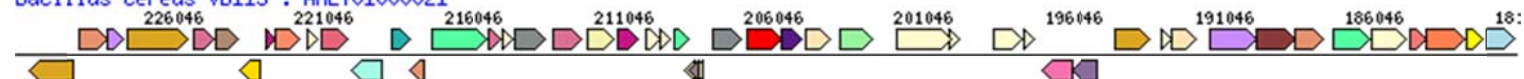

Bacillus cereus AH1271, unfinished sequence: NZ\_ACMR01000093

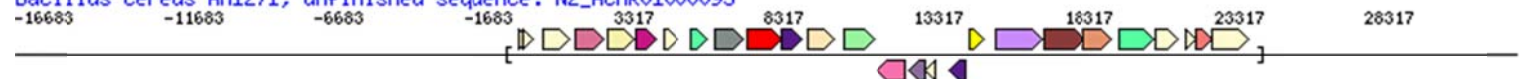

Bacillus cereus R309803, unfinished sequence: NZ\_ACLY01000040

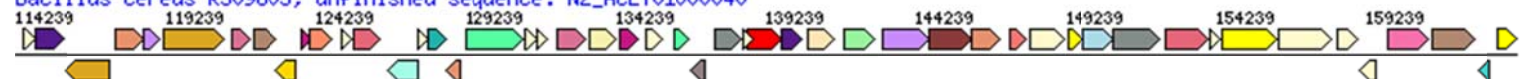

Bacillus cereus BAG2X1-2 : AHDA01000026

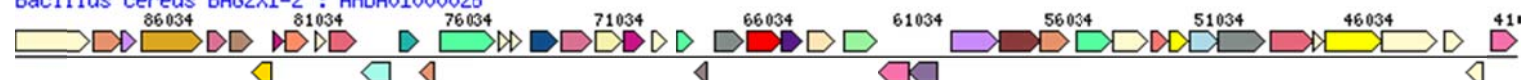

Bacillus cereus BAG6X1-1 : AHDO01000013

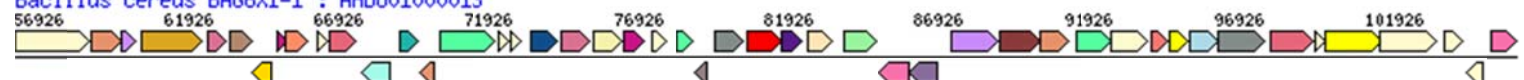

Bacillus cereus E33L: NC\_006274

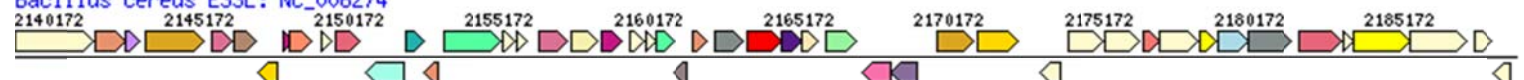

Bacillus anthracis str. A0488, unfinished sequence: NZ\_ABJC01000007

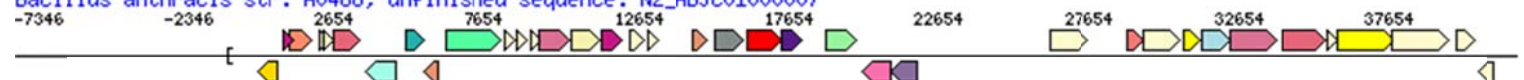

Bacillus anthracis str. CDC 684: NC\_012581

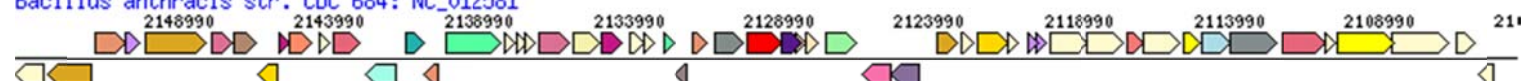

Bacillus anthracis str. Vollum: NZ\_AAEP01000025

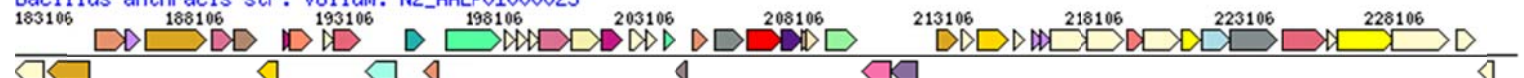



Bacillus cereus Rock3-28, unfinished sequence: NZ\_ACMI01000127

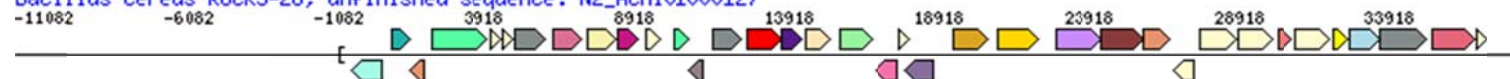

Bacillus thuringiensis serovar finitimus YBT-020: CP002508

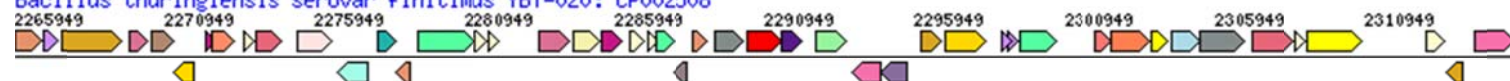

Bacillus cereus FRI-35 : CP003747

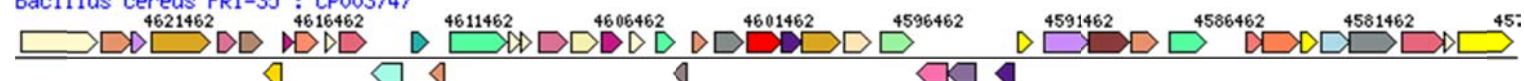

Bacillus cereus BAG20-3 : AHFY01000026

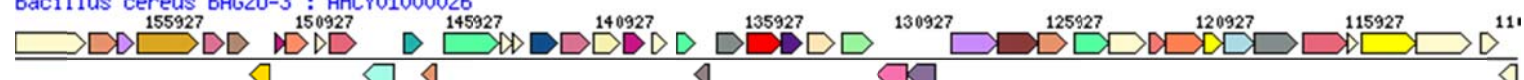

Bacillus cereus BAG30-1 : AHFV01000023

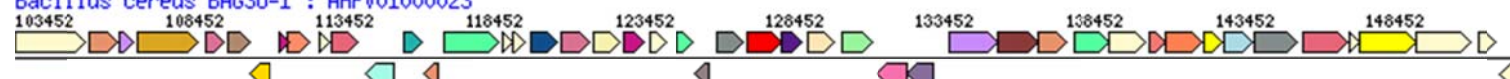

Bacillus cereus B5-2 : AHFW01000027

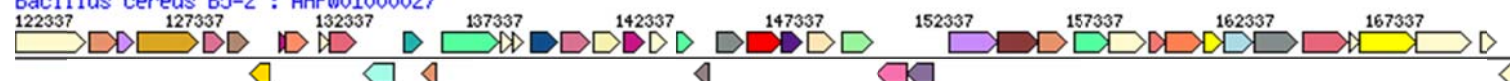

Bacillus cereus HuA4-10 : AHEA01000025

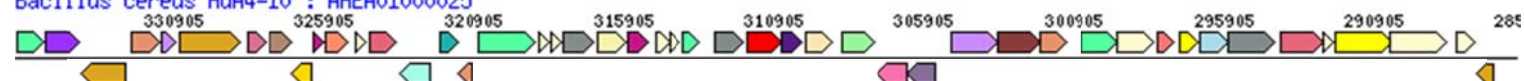

Bacillus cereus Q1: NC\_011969

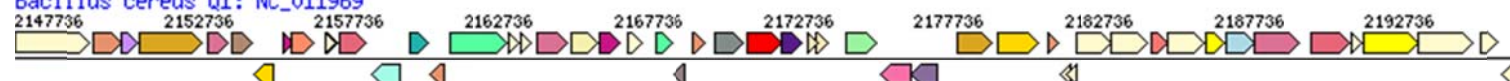

Bacillus cereus NC7401 : NC\_016771

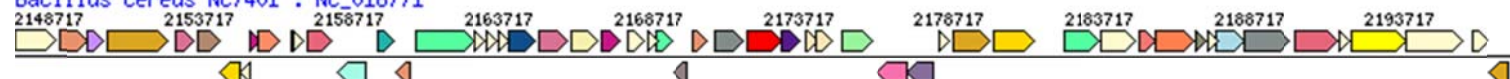



Bacillus cereus BAG2X1-3 : AHDB01000024

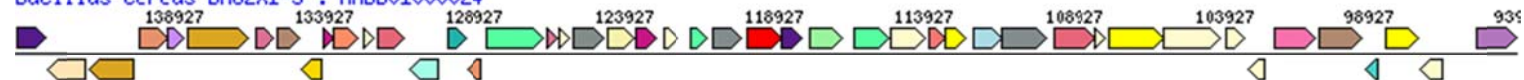

Bacillus cereus BAG2X1-1 : AHCZ01000025

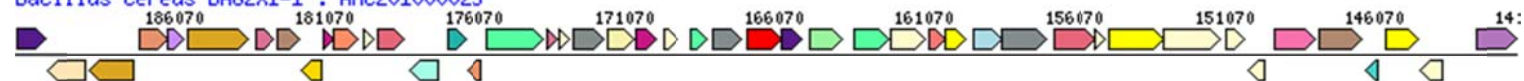

Bacillus anthracis str. Ames: NC\_003997

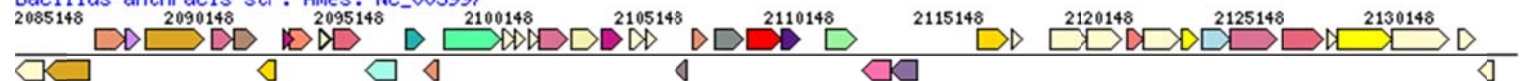

Bacillus anthracis str. 'Ames Ancestor': NC\_007530

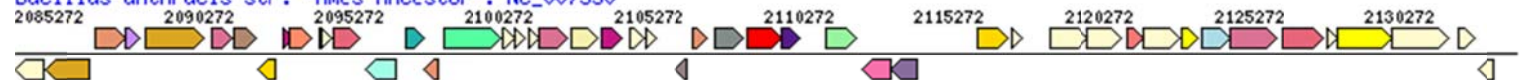

Bacillus cereus AH603, unfinished sequence: NZ\_ACMP01000064

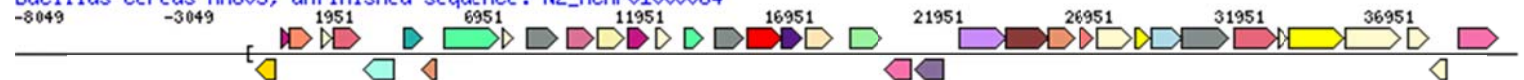

Bacillus cereus BAG6X1-2 : AHDP01000020

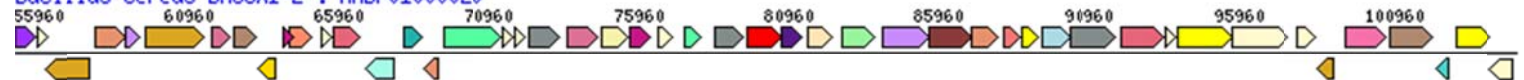

Bacillus cereus VD107 : AHGX01000014

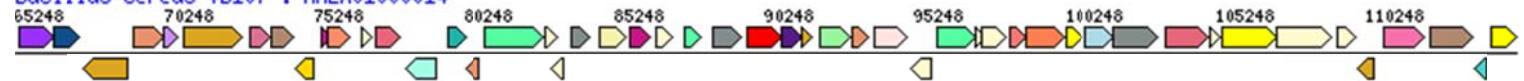

Bacillus cereus G9241, unfinished sequence: NZ\_AAEK01000006

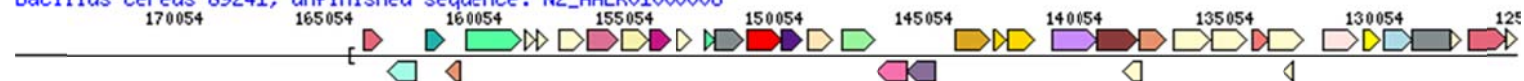

Bacillus cereus BAG5X1-1 : AHDJ01000028

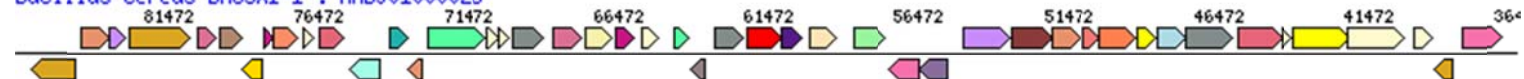

Bacillus cereus VDM022 : AHFP01000020

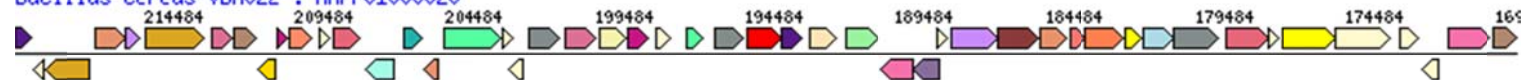

Bacillus cereus VDM078 : AHEV01000019

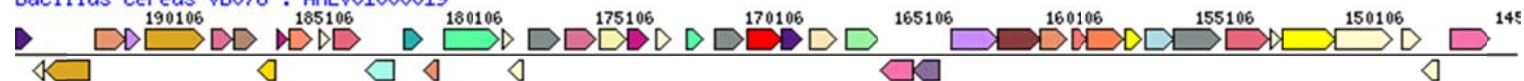

Bacillus cereus VDM019 : AHF001000023

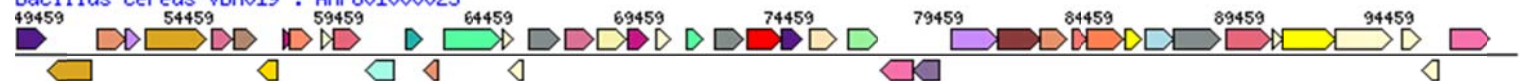

Bacillus cereus VDM021 : AHES01000030

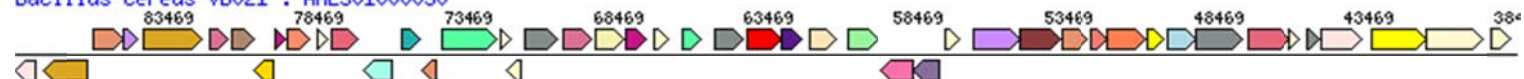

Bacillus cereus VDM146 : AHFE01000041

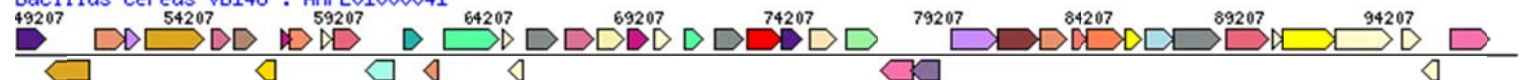

Bacillus cereus CER074 : AHDT01000022

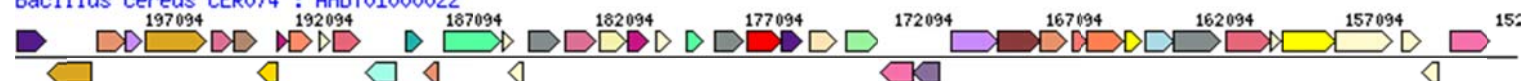

Bacillus cereus CER057 : AHDS01000024

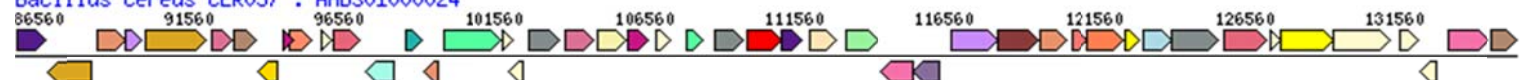

Bacillus cereus BtB2-4 : AHDR01000022

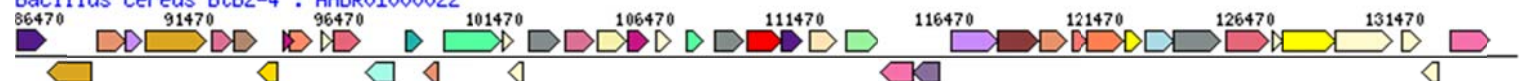

Bacillus cereus BDRD-ST196, unfinished sequence: NZ\_ACMD01000078

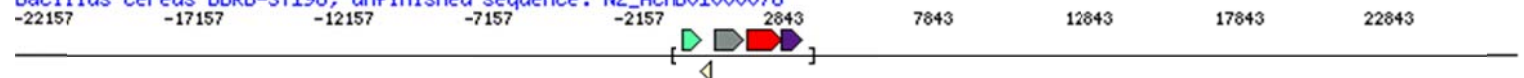

*Bacillus mycoides* DSM 2048, unfinished sequence: NZ\_ACMU01000044

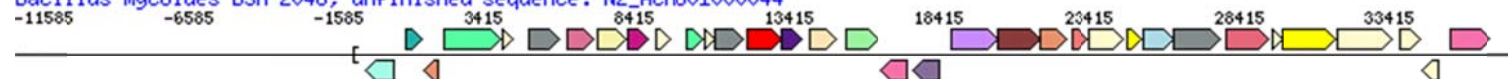

*Bacillus cereus* ATCC 10987: NC\_003909

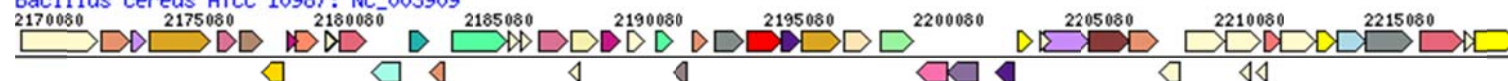

*Bacillus cereus* AH1272, unfinished sequence: NZ\_ACMS01000103

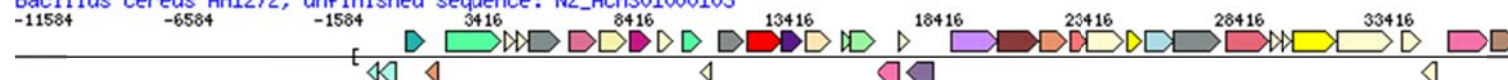

*Bacillus cereus* AH1273, unfinished sequence: NZ\_ACMT01000110

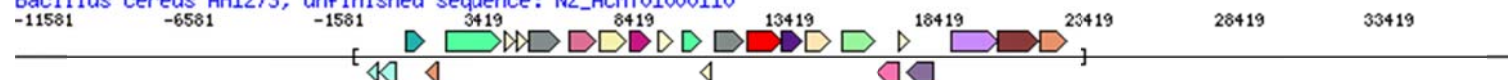

*Bacillus cereus* VD118 : AHEZ01000044

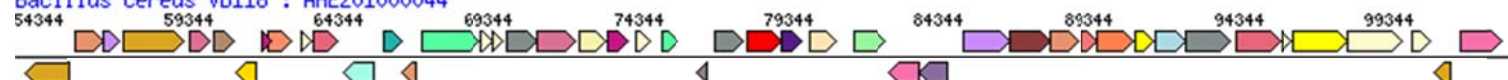

*Bacillus weihenstephanensis* KBAB4: NC\_010184

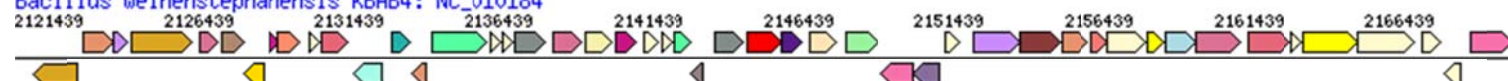

*Bacillus cereus* HuA2-9 : AHDY01000018

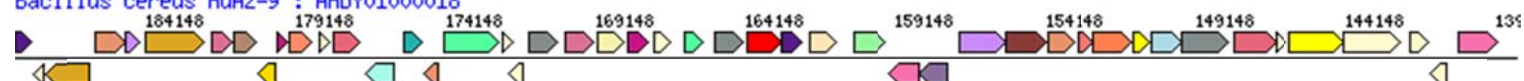

*Bacillus cereus* HuA3-9 : AHDZ01000001

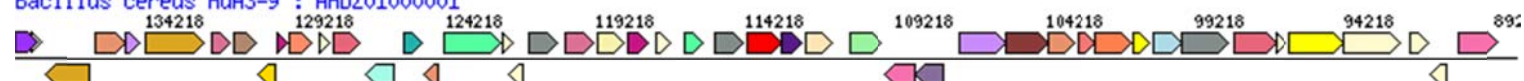

*Bacillus cereus* MC118 : AHEM01000036

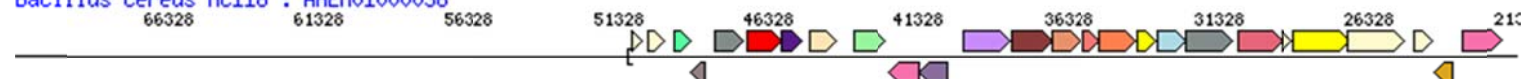



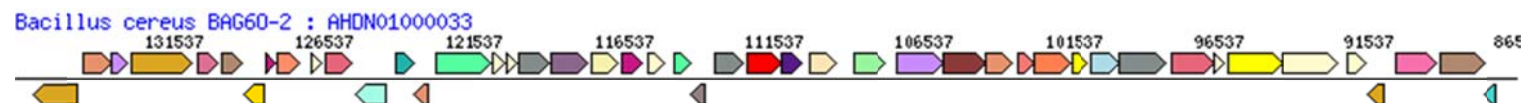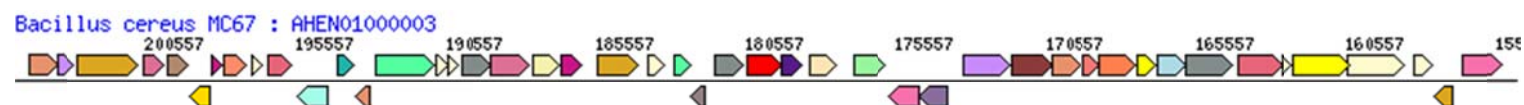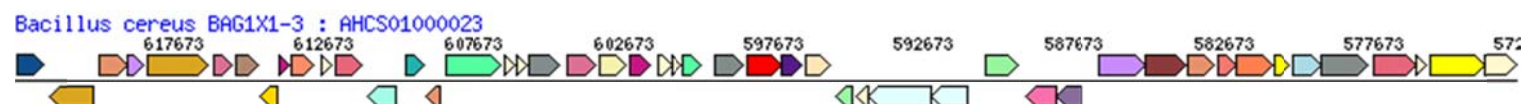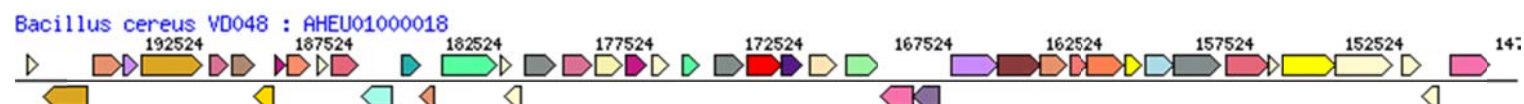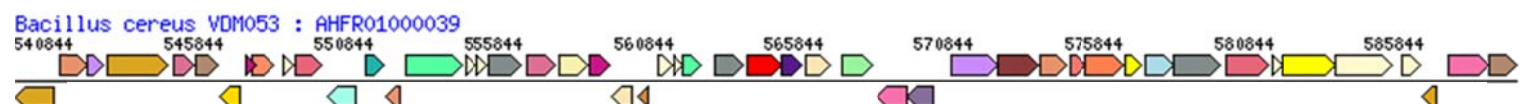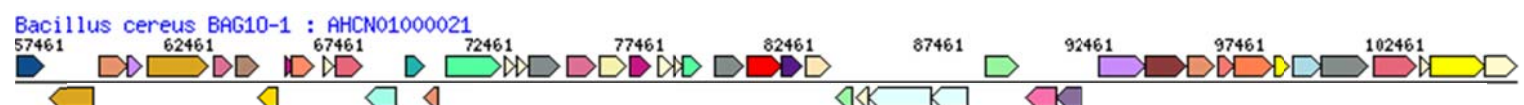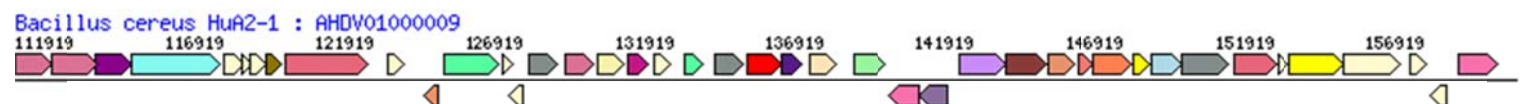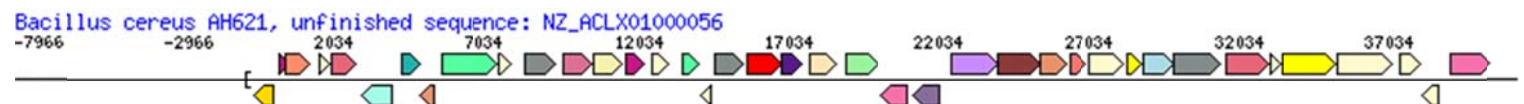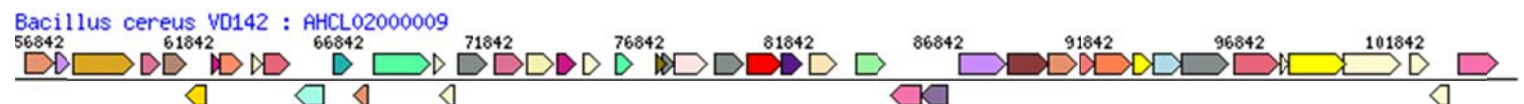



Bacillus cereus VDM062 : AHFS01000031

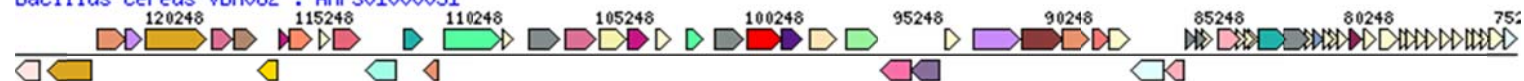

Bacillus cereus VDM034 : AHFQ01000013

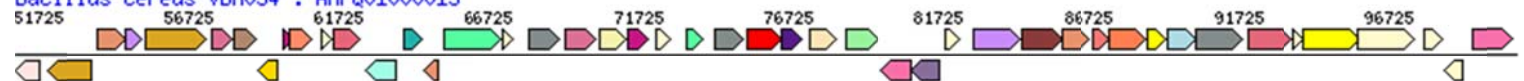

Bacillus cereus HuA2-4 : AHDX01000025

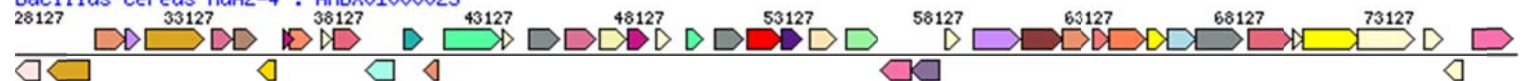

Bacillus cereus BAG3X2-1 : AHDD01000023

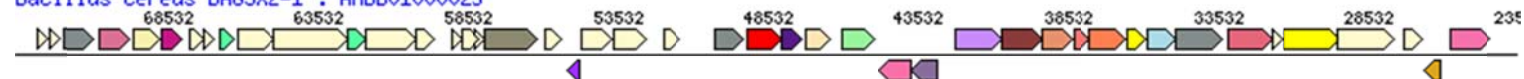

Bacillus mycoides Rock3-17, unfinished sequence: NZ\_ACMW01000051

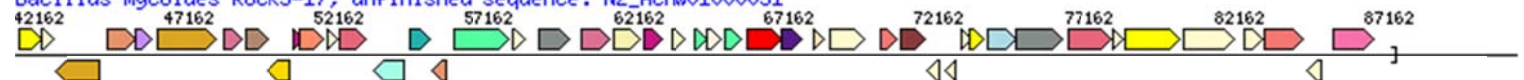

Bacillus cereus VDM006 : AHFT01000037

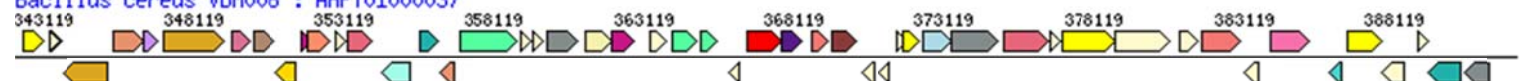

Bacillus cereus VDM021 : AHFU01000038

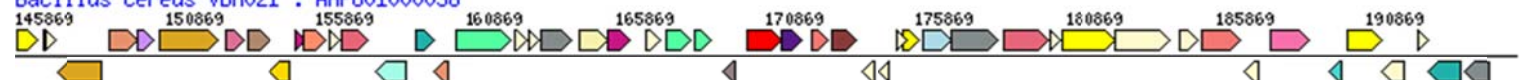

Bacillus sp. 95MFCvi2.1 : C568DRAFT\_scaffold00011.11

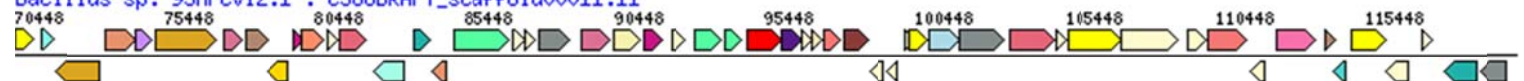

Bacillus cereus VD136 : AHFC01000047

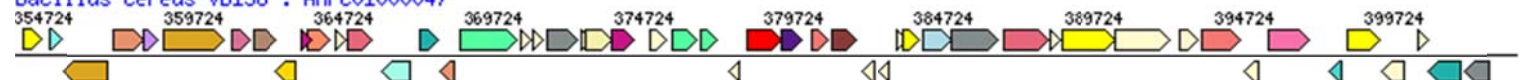

*Bacillus pseudomycoloides* DSM 12442, unfinished sequence: NZ\_ACMX01000036

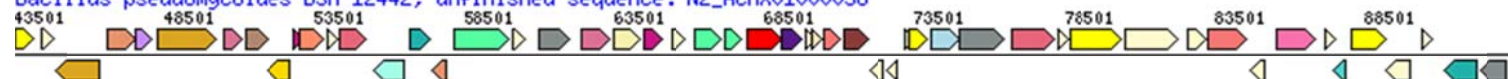

*Bacillus* sp. UNC437CL72CviS29 : M014DRAFT\_scaffold00017.17

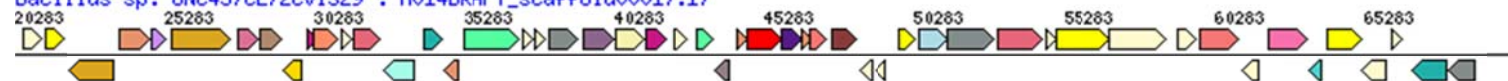

*Bacillus cereus* Rock3-44, unfinished sequence: NZ\_ACML01000120

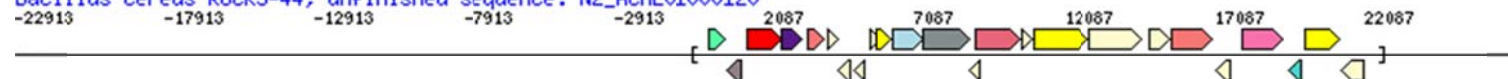

*Bacillus cereus* AH1134, unfinished sequence: NZ\_ABD01000020

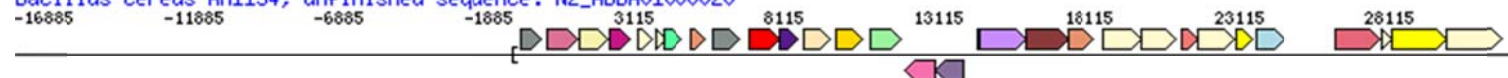

*Bacillus mycoloides* Rock1-4, unfinished sequence: NZ\_ACMV01000133

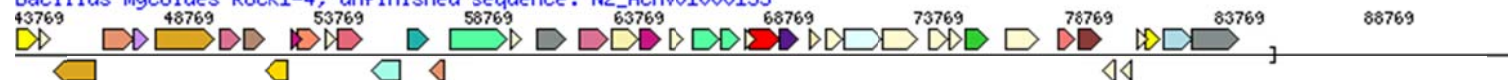

*Bacillus cereus* ATCC 14579: NC\_004722

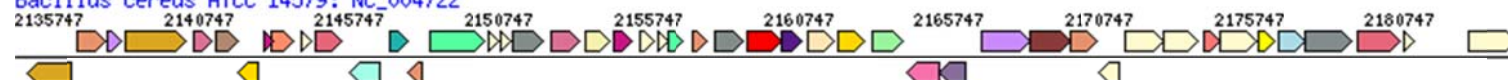

*Bacillus cereus* H3081.97, unfinished sequence: NZ\_ABDL01000001

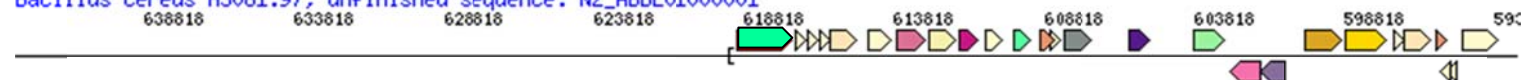

*Bacillus cereus* subsp. *cytotoxicus* NVH 391-98: NC\_009674

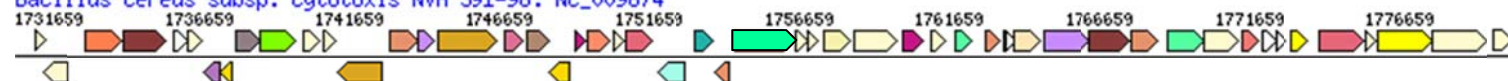

*Bacillus subtilis* subsp. *subtilis* str. 168: NC\_000964

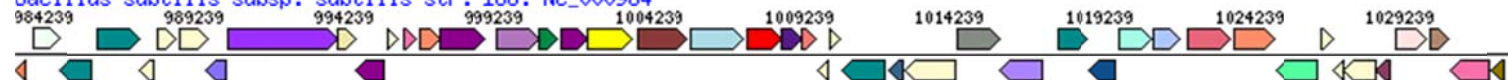









|                                   |    |                 |           |   |                 |                                   |        |       |          |     |
|-----------------------------------|----|-----------------|-----------|---|-----------------|-----------------------------------|--------|-------|----------|-----|
| Bacillus cereus VD107             | VI | AHEX01000014    | 145386bp  | D | IIM_01397       | hypothetical protein              | 90.30% | 372aa | 1.9e-193 | 681 |
| Bacillus cereus BAG5X1-1          | VI | AHDJ01000028    | 167843bp  | D | IEE_03023       | hypothetical protein              | 91.10% | 372aa | 2.5e-193 | 680 |
| Bacillus cereus VD118             | VI | AHEZ01000044    | 257274bp  | D | IIQ_01180       | two-component sensor protein yhcY | 90.90% | 372aa | 1.2e-192 | 678 |
| Bacillus cereus MC118             | VI | AHEM01000036    | 50635bp   | D | I11_03385       | two-component sensor protein yhcY | 90.60% | 372aa | 2.0e-192 | 677 |
| Bacillus cereus BAG6O-2           | VI | AHDN01000033    | 230347bp  | D | IEM_03141       | hypothetical protein              | 90.90% | 372aa | 2.0e-192 | 677 |
| Bacillus cereus MC67              | VI | AHEN01000003    | 229617bp  | D | I13_00196       | hypothetical protein              | 90.60% | 372aa | 2.0e-192 | 677 |
| Bacillus cereus BAG1X1-3          | VI | AHCS01000023    | 1262248bp | D | ICG_03309       | hypothetical protein              | 90.60% | 372aa | 2.8e-192 | 677 |
| Bacillus cereus VDM053            | VI | AHFR01000039    | 621715bp  | D | IKQ_01731       | two-component sensor protein yhcY | 90.60% | 372aa | 2.6e-192 | 677 |
| Bacillus cereus BAG10-1           | VI | AHCN01000021    | 162560bp  | D | IC7_01508       | two-component sensor protein yhcY | 90.60% | 372aa | 2.6e-192 | 677 |
| Bacillus cereus BAG3X2-1          | VI | AHDD01000023    | 113935bp  | D | IJE3_03212      | hypothetical protein              | 90.10% | 372aa | 1.4e-191 | 674 |
| Bacillus mycoides Rock3-17        | I  | NZ_ACMW01000051 | 87918bp   | D | bmyco0003_19320 | Two-component sensor protein yhcY | 84.80% | 374aa | 6.3e-184 | 649 |
| Bacillus cereus VDM006            | I  | AHFT01000037    | 802420bp  | D | KOW_00626       | two-component sensor protein yhcY | 84.70% | 372aa | 2.9e-183 | 647 |
| Bacillus cereus VDM021            | I  | AHFU01000038    | 209010bp  | D | KOY_03298       | two-component sensor protein yhcY | 84.70% | 372aa | 2.9e-183 | 647 |
| Bacillus cereus VD136             | I  | AHFC01000047    | 594013bp  | D | I1W_01264       | two-component sensor protein yhcY | 84.40% | 372aa | 8.3e-183 | 645 |
| Bacillus pseudomycoides DSM 12442 | I  | NZ_ACMX01000036 | 125315bp  | D | bpmyx0001_20100 | Two-component sensor protein yhcY | 84.40% | 372aa | 2.0e-182 | 644 |
| Bacillus cereus Rock3-44          | I  | NZ_ACMLO1000120 | 22469bp   | D | bcere0022_18280 | Two-component sensor protein yhcY | 83.60% | 372aa | 6.5e-181 | 639 |
| Bacillus mycoides Rock1-4         | I  | NZ_ACMV01000133 | 85498bp   | D | bmyco0002_19200 | Two-component sensor protein yhcY | 84.30% | 313aa | 4.8e-152 | 543 |

All data, except data from the second column, came from Integrated Microbial Genomes data base (Markowitz et al., 2012); homologs for *casKR* genes were first determined through BLASTp hits between *casKR* genes from ATCC14579 genome (bc2216-17) and genes in all other genomes, and orthologs were computed as bidirectional best hits between genomes; percent identity, length of sequence, E-value and bit score are displayed for each ortholog. The C2S was absent on NVH391-98 genome (phylogenetic group VII)

<sup>(1)</sup> affiliation to phylogenetic groups using *panC* gene sequence, as previously described (Guinebretiere et al., 2010); <sup>(2)</sup> Genome completion, D : draft, F : finished; <sup>(3)</sup> percent identity for translated proteins; <sup>(4)</sup> NA : not applicable







|                                    |    |                 |           |   |                 |                                              |        |       |          |     |
|------------------------------------|----|-----------------|-----------|---|-----------------|----------------------------------------------|--------|-------|----------|-----|
| Bacillus cereus VD107              | VI | AHEX01000014    | 145386bp  | D | IIM_01398       | hypothetical protein                         | 91.90% | 211aa | 3.1e-103 | 380 |
| Bacillus cereus BAG5X1-1           | VI | AHDJ01000028    | 167843bp  | D | IEE_03022       | hypothetical protein                         | 92.40% | 211aa | 1.6e-104 | 384 |
| Bacillus cereus VD118              | VI | AHEZ01000044    | 257274bp  | D | IIQ_01181       | two-component system response regulator yhcZ | 91.90% | 211aa | 1.5e-104 | 384 |
| Bacillus cereus MC118              | VI | AHEM01000036    | 50635bp   | D | I11_03384       | two-component system response regulator yhcZ | 93.40% | 211aa | 8.0e-106 | 389 |
| Bacillus cereus BAG6O-2            | VI | AHDN01000033    | 230347bp  | D | IEM_03140       | hypothetical protein                         | 91.90% | 211aa | 1.5e-104 | 384 |
| Bacillus cereus MC67               | VI | AHEN01000003    | 229617bp  | D | I13_00195       | hypothetical protein                         | 93.40% | 211aa | 8.0e-106 | 389 |
| Bacillus cereus BAG1X1-3           | VI | AHCS01000023    | 1262248bp | D | ICG_03308       | hypothetical protein                         | 92.90% | 211aa | 8.6e-106 | 389 |
| Bacillus cereus VDM053             | VI | AHFR01000039    | 621715bp  | D | IKQ_01732       | two-component system response regulator yhcZ | 91.90% | 211aa | 8.8e-105 | 385 |
| Bacillus cereus BAG1O-1            | VI | AHCN01000021    | 162560bp  | D | IC7_01509       | two-component system response regulator yhcZ | 92.90% | 211aa | 8.0e-106 | 389 |
| Bacillus cereus BAG3X2-1           | VI | AHDD01000023    | 113935bp  | D | IE3_03211       | hypothetical protein                         | 92.90% | 211aa | 6.6e-106 | 389 |
| Bacillus mycoides Rock3-17         | I  | NZ_ACMW01000051 | 87918bp   | D | bmyco0003_19330 | DNA-binding response regulator               | 90.40% | 211aa | 6.5e-101 | 372 |
| Bacillus cereus VDM006             | I  | AHFT01000037    | 802420bp  | D | KOW_00627       | two-component system response regulator yhcZ | 89.90% | 211aa | 4.2e-99  | 366 |
| Bacillus cereus VDM021             | I  | AHFU01000038    | 209010bp  | D | KOY_03299       | two-component system response regulator yhcZ | 89.90% | 211aa | 4.2e-99  | 366 |
| Bacillus cereus VD136              | I  | AHFC01000047    | 594013bp  | D | I1W_01265       | two-component system response regulator yhcZ | 89.90% | 211aa | 4.2e-99  | 366 |
| Bacillus pseudomycolides DSM 12442 | I  | NZ_ACMX01000036 | 125315bp  | D | bpmyx0001_20110 | DNA-binding response regulator               | 90.40% | 211aa | 6.5e-101 | 372 |
| Bacillus cereus Rock3-44           | I  | NZ_ACMLO1000120 | 22469bp   | D | bcere0022_18290 | DNA-binding response regulator               | 89.50% | 211aa | 1.3e-98  | 365 |
| Bacillus mycoides Rock1-4          | I  | NZ_ACMV01000133 | 85498bp   | D | bmyco0002_19210 | DNA-binding response regulator               | 90.40% | 211aa | 6.5e-101 | 372 |

All data, except data from the second column, came from Integrated Microbial Genomes data base (Markowitz et al., 2012); homologs for *casKR* genes were first determined through BLASTp hits between *casKR* genes from ATCC14579 genome (bc2216-17) and genes in all other genomes, and orthologs were computed as bidirectional best hits between genomes; percent identity, length of sequence, E-value and bit score are displayed for each ortholog. The C2S was absent on NVH391-98 genome (phylogenetic group VII)

<sup>(1)</sup> affiliation to phylogenetic groups using *panC* gene sequence, as previously described (Guinebreiere et al., 2010); <sup>(2)</sup> Genome completion, D : draft, F : finished; <sup>(3)</sup> percent identity for translated proteins; <sup>(4)</sup> NA : not applicable
